1 **Determination of m<sup>6</sup>A frequency utilizing 4SedTTP-RT Ligation Assisted PCR (SLAP) in viral and**  
2 **cellular long non-coding RNAs**

3 Sarah E Martin<sup>1</sup>, Huachen Gan<sup>1</sup> and Joanna Sztuba-Solinska<sup>1\*</sup>

4 <sup>1</sup>Department of Biological Sciences, Auburn University, 120 W. Samford Ave, Rouse Life Sciences  
5 Building, Auburn, AL 36849, United States

6 \*For correspondence: Joanna Sztuba-Solinska, [jzs0165@auburn.edu](mailto:jzs0165@auburn.edu)

7

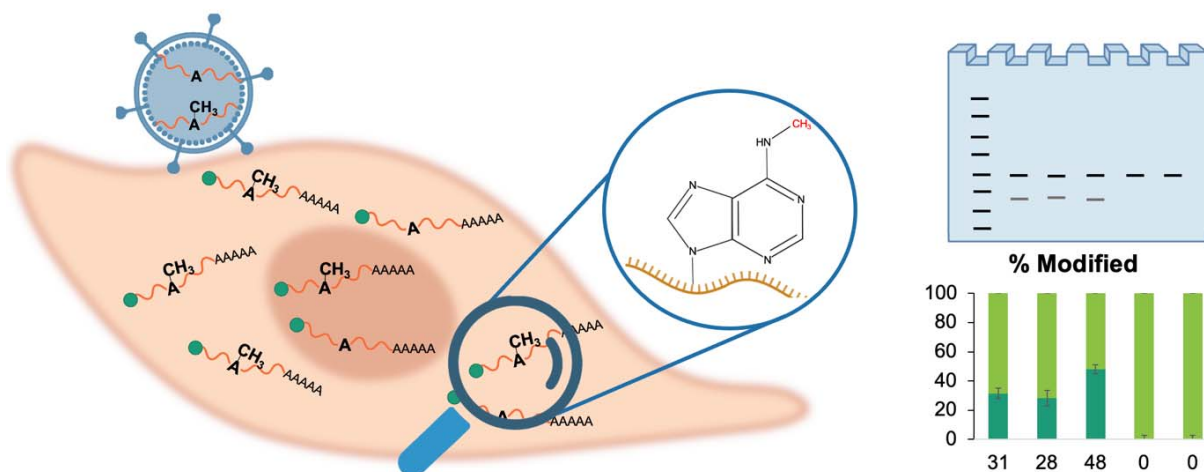

8 **Graphical Abstract**

9

10 **Abstract**

11 N<sup>6</sup>-methyladenosine is one of the most abundant epitranscriptomic signatures that can affect every  
12 aspect of RNA biology, from structure and stability to intra- and intermolecular interactions. The accurate  
13 quantitative assessment of RNA stoichiometry at single-nucleotide resolution is a prerequisite to evaluate  
14 the biological significance of m<sup>6</sup>A in the context of specific RNA. We have developed a new method,  
15 termed 4-Selenothymidine 5'-triphosphate reverse transcription and Ligation Assisted PCR analysis  
16 (SLAP), for quantitative and unbiased assessment of the m<sup>6</sup>A fraction on target RNA. The inclusion of  
17 thymidine triphosphate derivative during reverse transcription discourages base pair formation with m<sup>6</sup>A  
18 resulting in the reaction's cessation, while maintaining normal A-T base pairing. The site-specific ligation  
19 of the resulting cDNAs with adapters, followed by amplification, generates two distinct products that  
20 reflect the modified and unmodified fraction of the analyzed RNA. These PCR products are subsequently

21 separated by gel electrophoresis and quantified using densitometric analysis. We applied the SLAP to  
22 verify the position and assess the frequency of m<sup>6</sup>A sites present on two exemplary long non-coding  
23 RNAs. We assessed the SLAP specificity, accuracy, and sensitivity, proving the applicability of this  
24 method for the m<sup>6</sup>A analysis on less abundant transcripts. Overall, this method constitutes an extension of  
25 the bird's-eye view of RNA m<sup>6</sup>A landscape provided by epitranscriptome-wide analyses by delivering  
26 quantitative assessment of modification frequency and can therefore aid the understanding of the  
27 consequences of m<sup>6</sup>A on biological processes.

28

29 **Keywords:** N<sup>6</sup>-methyladenosine, epitranscriptomic modification, RNA, stoichiometry, 4SedTTP

30

## 31 **Background**

32 N<sup>6</sup>-methyladenosine (m<sup>6</sup>A) is an epitranscriptomic modification that involves the methylation of the  
33 sixth position of the base moiety of adenine. It is one of the most abundant chemical signatures found on  
34 coding and non-coding (nc) RNAs expressed by all living taxa (Jiang et al. 2021; Coker et al. 2019; Liu et  
35 al. 2014; Bokar et al. 1997; Wang et al. 2016), and non-living forms, i.e., viruses (Wu et al. 2019; Tan and  
36 Gao 2018; McIntyre et al. 2018; Baquero-Perez et al. 2021). For the past few decades, the biological  
37 significance of m<sup>6</sup>A remained elusive. Recent developments in the next-generation sequencing methods  
38 brought the long-awaited breakthrough in the field and demonstrated the overwhelming significance of  
39 m<sup>6</sup>A for RNA biology. It has been shown that m<sup>6</sup>A functions at almost all stages of messenger (m) RNA  
40 lifetime, including splicing, translation, stability, export, and subcellular localization (Zhou et al. 2019b;  
41 Bartosovic et al. 2017; Zhou et al. 2019a; Meyer et al. 2015; Wang et al. 2015, 2014; Kane and Beemon  
42 1985). For example, the installation of m<sup>6</sup>A within the splice site of precursor mRNA coding for S-  
43 adenosylmethionine synthetase inhibits its proper splicing and translation (Mendel et al. 2021). Also, m<sup>6</sup>A  
44 found within the coding region of mRNAs positively regulates translation by resolving RNA secondary  
45 structures (Mao et al. 2019). In ncRNAs, the breadth of m<sup>6</sup>A impact is attributed to local and global  
46 structural changes that can influence the accessibility of RNA motifs for effectors binding. For example,  
47 the modification of metastasis-associated lung adenocarcinoma transcript 1 (MALAT1) regulates the  
48 binding of heterogeneous nuclear ribonucleoprotein C (HNRNPC) to U-rich hairpin. Likewise, the

49 modification of A-repeat domain in X-inactive specific transcript (XIST) facilitates the specific folding of the  
50 transcript, which guides proteins involved in transcriptional silencing to their RNA binding motifs (Lu et al.  
51 2020).

52 The m<sup>6</sup>A is a highly dynamic signature regulated by the action of methyltransferases and  
53 demethylases. Methyltransferases, referred to as “writers”, install the m<sup>6</sup>A modification. Demethylases  
54 act as “erasers,” remove the chemical tag (Yang et al. 2018; Schwartz et al. 2014). The writers are  
55 thought to recognize the consensus sequence RRACH (where R is a purine, H is adenine, cytosine, or  
56 uracil). Not every RRACH motif, however, undergoes methylation (Bokar 2005). This fact suggests that  
57 RNA structural determinants can influence the deposition of this chemical tag (Mateusz Mendel et al.  
58 2018). Most m<sup>6</sup>A are installed by METTL3/14 complex (Śledź and Jinek 2016), the binding and catalytic  
59 activity of which seems to be independent of substrate’s structure, while the activity of another writer,  
60 METTL16, is structure mediated (Mateusz Mendel et al. 2018). The direct outcome of writer and eraser  
61 activity influences the position, frequency, and the overall abundance of m<sup>6</sup>A, thus determining the  
62 breadth of its impact on RNA biology. For example, suppose methylation at a given site serves as a gene  
63 regulatory mechanism. In this instance, the protein occupancy of controlled modification site is expected  
64 to vary over the lifetime of RNA to alter its function.

65 Despite the rapidly growing recognition of m<sup>6</sup>A significance, the prevalence and functional  
66 consequences of m<sup>6</sup>A remain elusive as the currently available detection methods are primarily  
67 qualitative. The widely available antibody-based next-generation sequencing mapping methods, including  
68 m<sup>6</sup>A-seq (Dominissini et al. 2012), methylated RNA immunoprecipitation (m<sup>6</sup>A-MeRIP) (Meyer et al.  
69 2012), and m<sup>6</sup>A individual-nucleotide-resolution crosslinking and immunoprecipitation (miCLIP) (Linder et  
70 al. 2015), are burden with various shortcomings, e.g., the high signal-to-noise ratio, large number of false  
71 positives due to cross-reactivity of antibodies with related modifications (Linder et al. 2015; Dominissini et  
72 al. 2012). Furthermore, since these methods involve the multi-step protocols for library preparation, they  
73 often result in poor data reproducibility, hindering the between-sample analyses. Site-specific cleavage  
74 and radioactive-labeling followed by ligation-assisted extraction and thin-layer chromatography  
75 (SCARLET) uses complementary oligonucleotides targeted to known modification sites to investigate the  
76 occupancy of the modification but is an exceptionally laborious method that relies on radioactivity (Liu et

77 al. 2013a). The Liquid Chromatography with tandem mass spectrometry (LC-MS/MS) is currently the only  
78 technology that can directly and comprehensively estimate the frequency of epitranscriptomic  
79 modifications. However, the information about the sequence context and co-occurrence of other  
80 modifications is lost during RNA hydrolysis, and the method demands large quantities of highly purified  
81 RNA (Wein et al. 2020).

82 In this manuscript, we provide a detailed outline of a novel antibody-independent termination-based  
83 method for the target-specific quantification of m<sup>6</sup>A frequency (Figure 1). Our method, termed Selenium-  
84 modified deoxythymidine triphosphate reverse transcription and Ligation Assisted PCR (SLAP), relies on  
85 the use of 4-selenothymidine-5'-triphosphate (4SedTTP) during reverse transcription (RT). 4SedTTP  
86 carries a selenium atom at the 4-position of deoxythymidine triphosphate instead of oxygen. That  
87 replacement affords exclusive hybridization properties when incorporated into TTP nucleobase due to its  
88 unique steric and electronic efforts (Hong et al. 2018). During RT, the 4SedTTP supports A-T pairing and  
89 at the same time discourages m<sup>6</sup>A/T pairing, triggering RT termination at +1 position from the modification  
90 (Hong et al. 2018). Truncated and full-length products corresponding to modified and unmodified  
91 adenines, respectively, are subsequently ligated to an adapter carrying a primer binding site to allow for  
92 the simultaneous and uniform amplification of both types of cDNA products in a single PCR reaction. This  
93 approach yields quantitative and unbiased information for each m<sup>6</sup>A site, and because the SLAP method  
94 relies on the use of target- and site- specific RT primers, the modification frequency can be determined  
95 regardless of its location, i.e., inside, or outside of the consensus sequence.

96 We applied SLAP to analyze the frequency of m<sup>6</sup>A at multiple sites found on two long non-coding (lnc)  
97 RNAs, i.e., polyadenylated nuclear (PAN) RNA encoded by Kaposi's sarcoma-associated herpesvirus  
98 (KSHV) (Martin et al. 2021), and cellular lncRNA MALAT1 (Yang et al. 2013). We assessed the sensitivity  
99 of this method by titrating in vitro synthesized PAN transcript to the total cellular RNA and revealed that  
100 the method provides an accurate estimation of modification frequency at an attomolar concentration of  
101 the target. This highlights the potential of the SLAP method for analyzing m<sup>6</sup>A stoichiometry on low  
102 abundance RNAs. Paired with any of the available next-generation sequencing methods, our protocol not  
103 only provides further verification of m<sup>6</sup>A localization at the single-nucleotide resolution but, most  
104 importantly, the quantitative estimate of modification abundance.

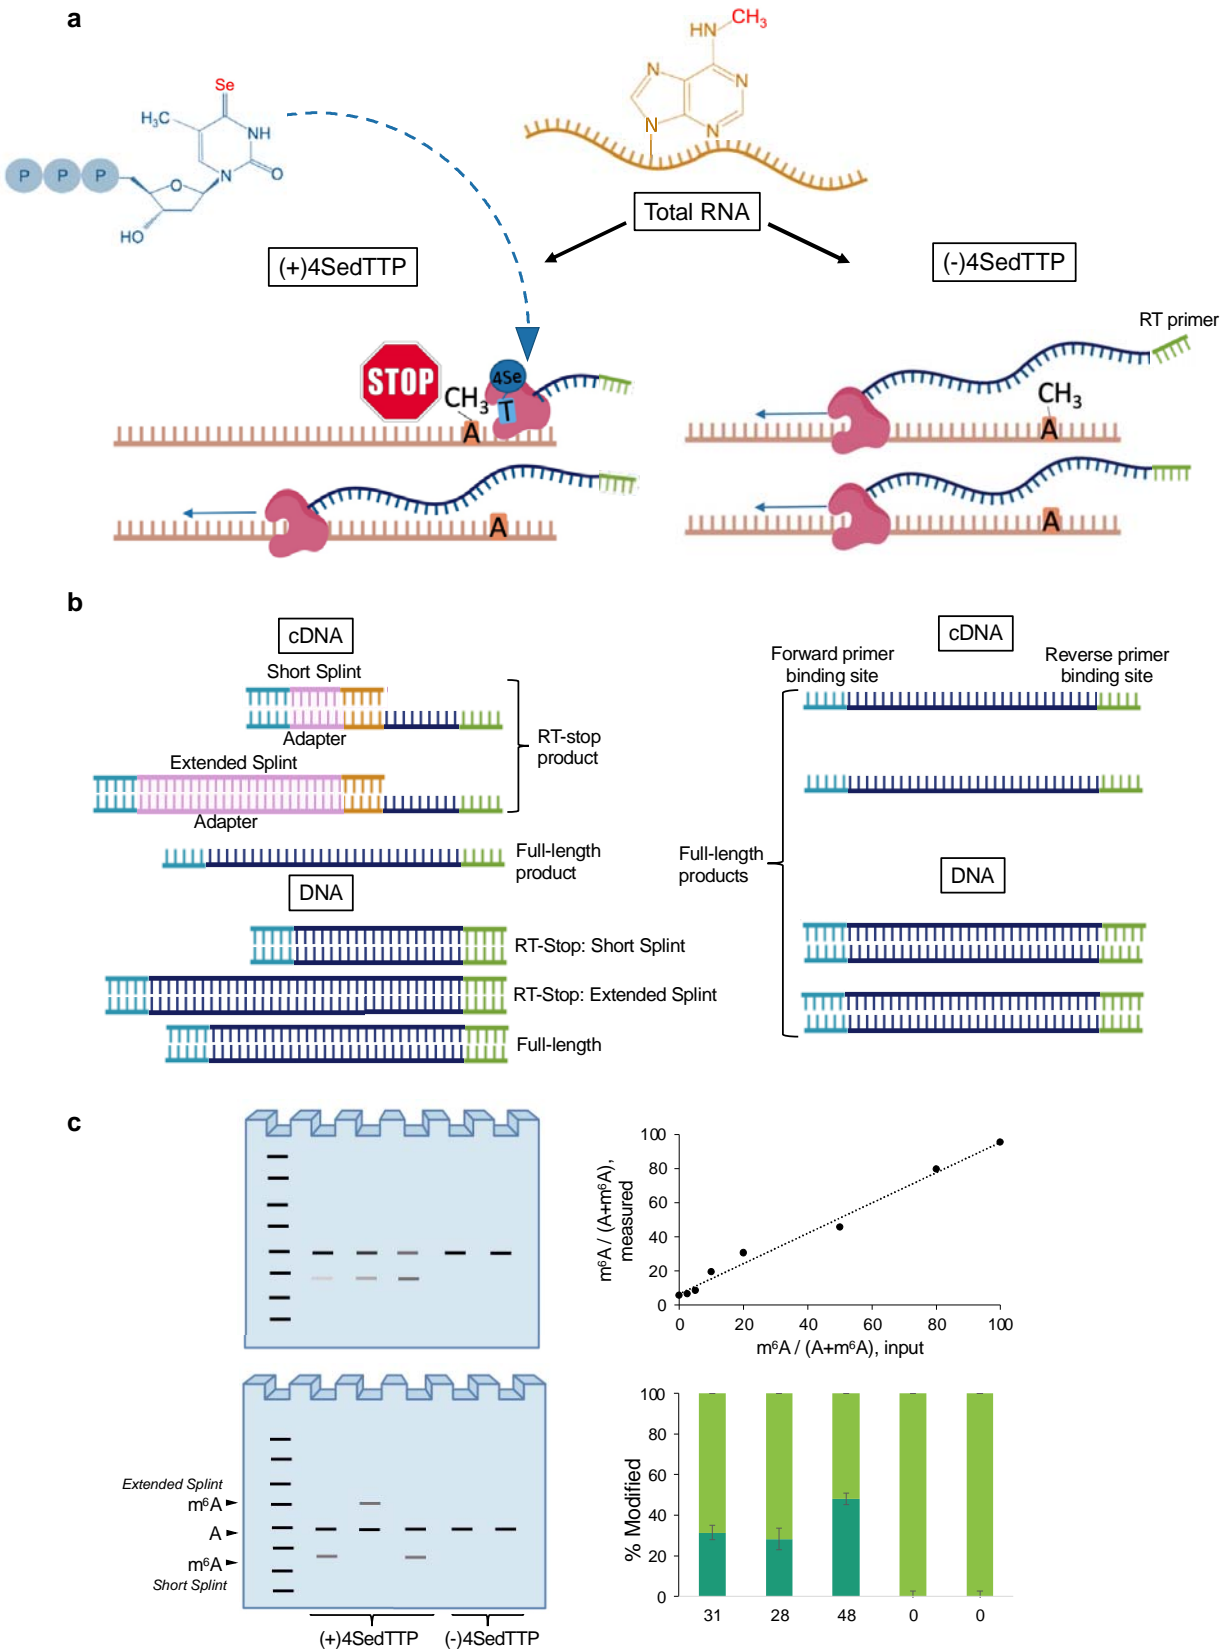

106 **Figure 1. Schematic overview of the SLAP method. a, Reverse Transcription.** 4SedTTP is used during reverse  
107 transcription reaction (RT) to prompt RT-stop formation at +1 position from m<sup>6</sup>A. **b, Splint bridge and adapter**  
108 **ligation.** A splint oligonucleotide is annealed to the truncated cDNA product that results from reverse transcription of  
109 the modified RNA. The splint oligonucleotide has a 5' complementarity to the adapter oligonucleotide that is ligated to  
110 RT-stop product to introduce the reverse primer binding site. For m<sup>6</sup>A close to the 5' or 3' end of the transcript,  
111 extended splint should be utilized to allow for size-differentiation between modified and unmodified products. **c,**  
112 **Densitometric analysis of experimental results.** Subsequent PCR reaction performed using a common set of  
113 forward and reverse primers, simultaneously amplifies both full-length and RT-stop products. The PCR products are  
114 visualized on native polyacrylamide gel (PAGE) and directed to densitometric analysis. The densitometric  
115 measurements are compared to the established calibration curve to assess the m<sup>6</sup>A stoichiometry.  
116

## 117 RESULTS

### 118 Target m<sup>6</sup>A modified RNAs.

119 PAN RNA is a lncRNA expressed by Kaposi's sarcoma-associated herpesvirus (KSHV) at low levels  
120 during latency (10<sup>3</sup> copies/cell according to our estimates, data not published), but it can reach up to 10<sup>5</sup>  
121 copies/cell 24 hours post lytic induction in BCBL-1 cells. PAN RNA was proposed to associate with  
122 chromatin modulating complexes, histones, and has been implicated in the altering of viral and cellular  
123 gene expression (Rossetto and Pari 2014). Other studies suggest that PAN RNA facilitates late viral  
124 mRNA export from the nucleus to the cytoplasm (Withers et al. 2018). We recently applied 4-  
125 selenothymidine-5'-triphosphate reverse transcription (4SedTTP RT) with next generation sequencing  
126 method to analyze the PAN RNA m<sup>6</sup>A landscape during KSHV replication (Martin et al. 2021). Our  
127 findings showed that PAN RNA can carry up to five m<sup>6</sup>A residues during the late lytic stages of KSHV  
128 replication. The functionality of these residues is yet to be determined.

129 MALAT1 is a nuclear lncRNA which exhibits copy number changes (on average 2,500 copies/cell  
130 (Tripathi et al. 2010), translocations, or mutations in several cancer types (Arun et al. 2020). MALAT1 was  
131 shown to be m<sup>6</sup>A modified by the application of m<sup>6</sup>A-specific methylated RNA immunoprecipitation with  
132 next-generation sequencing (m<sup>6</sup>A/MeRIP-Seq) (KD et al. 2012). Since the m<sup>6</sup>A/MeRIP-seq method  
133 combines m<sup>6</sup>A antibody immune-precipitation and deep sequencing to locate m<sup>6</sup>A in ~200 nt RNA  
134 segments, it cannot identify which adenosine residue under the deep sequencing peaks is modified, nor  
135 can it determine the modification fraction for any modification site. To address this challenge, Liu et al.  
136 applied the SCARLET method to directly measure the location and m<sup>6</sup>A fraction on MALAT1 in three  
137 different cell lines (Liu et al. 2013a). They found that m<sup>6</sup>A is present at four out of seven previously  
138 identified sites, and that, the modification fraction varied by up to threefold between cell lines. The m<sup>6</sup>A  
139 sites on MALAT1 were shown to regulate protein binding through invoking the RNA structural changes. In

140 particular, m<sup>6</sup>A modification at nt 2577 was shown to destabilize the modified hairpin and release a poly-U  
141 tract for an increased binding of m<sup>6</sup>A reader protein, Heterogenous Nuclear Ribonucleoprotein C  
142 (HNRNPC) (Yang et al. 2013; He et al. 2020).

143

#### 144 **Establishing the SLAP calibration curves for target RNAs.**

145 To estimate the m<sup>6</sup>A stoichiometry on target RNA, it is necessary to establish the proper calibration  
146 curve. We combined 100 nt in vitro synthesized m<sup>6</sup>A modified (nucleotide (nt) position 82 on PAN RNA  
147 and nt position 65 on MALAT1) and unmodified RNA standards at the following ratios (0:1, 40:1, 20:1, 9:1,  
148 4:1, 1:1, 1:4, and 1:0), that reflected the modification percentage (0, 2.5, 5, 10, 20, 50, 80, and 100%,  
149 respectively) for the total of 30 femtomole, and spiked them with the 1 µg total RNA extracts. This  
150 approach is meant to mimic the experimental conditions one would work with during the SLAP analysis  
151 performed on RNA expressed in living cells. The combined RNA standards were directed to reverse  
152 transcription reactions (RT) using the avian myoblastoma virus (AMV) reverse transcriptase. Other types  
153 of reverse transcriptase, including SuperScript II and III, perform equally well in the 4SedTTP RT  
154 reactions, and as such they can replace AMV (Hong et al. 2018; Martin et al. 2021). Each ratio of  
155 combined RNA standards was directed to two RT reactions, i.e., positive reaction performed in the  
156 presence of SedTTP (+SedTTP RT) and negative control reaction, in which SedTTP was replaced with  
157 TTP (-SedTTP RT). The RT-stop cDNA products resulting from reverse transcription of modified RNAs  
158 were site-specifically ligated with splint-adaptor oligonucleotide duplex to yield products that can be  
159 simultaneously amplified with full-length products that correspond to unmodified RNA. Following  
160 amplification, the products were resolved on native polyacrylamide gel and quantified.

161 From the calibration curve established for PAN RNA, we estimated that the SLAP allows for  
162 quantification of m<sup>6</sup>A frequency at as low as 2.5% level ( $4.5 \times 10^8$  copies modified). The positive reactions  
163 that included unmodified transcript (+0%, [Figure 2a](#)) yielded a weak m<sup>6</sup>A-specific product, which was  
164 considered as the background, and as such a 2-fold threshold above that background was applied to  
165 assess the modification stoichiometry. Also, a minor background product was notable for negative  
166 reactions, suggesting the occurrence of non-specific-to-m<sup>6</sup>A truncations in some RT reactions.  
167 Interestingly, the sample including 100% modified transcript resulted in an estimation of m<sup>6</sup>A frequency at

168 92% level, which suggests a minor underestimation of the actual modification fraction. Overall, for these  
169 combined standards we achieved linear regression of  $R^2 = 0.988$  (Figure 2b). Using the same approach,  
170 we also established a calibration curve for MALAT1 (Figure 2d), which allowed for the quantification of  
171  $m^6A$  frequency at equally low levels (2.5%) compared to PAN RNA, and we obtained the linear regression  
172 of  $R^2 = 0.985$  (Figure 2e). The establishment of an optimized standard curve with an  $R^2$  value  $>0.980$  is  
173 critical for the precise estimation of  $m^6A$  modification frequency.

174 To test the sensitivity of the SLAP method, we performed a serial dilution of combined at 1:1 ratio  $m^6A$   
175 modified and unmodified RNA standards, that were subsequently spiked with 1  $\mu g$  of total RNA and  
176 directed to the analysis. We tested the total concentrations of 0.25, 0.5, 1, 2.5, and 5 femtomole RNA to  
177 determine the minimum concentration that allows for the determination of  $m^6A$  frequency. We were able to  
178 quantify the stoichiometry of  $m^6A$  on the target RNA that was present at as low as 500 attomolar (aM)  
179 concentration ( $5.5 \times 10^8$  copies, Figure 2c). Thus, the SLAP can likely be applied to analyze the frequency  
180 of  $m^6A$  on low abundance target RNAs.

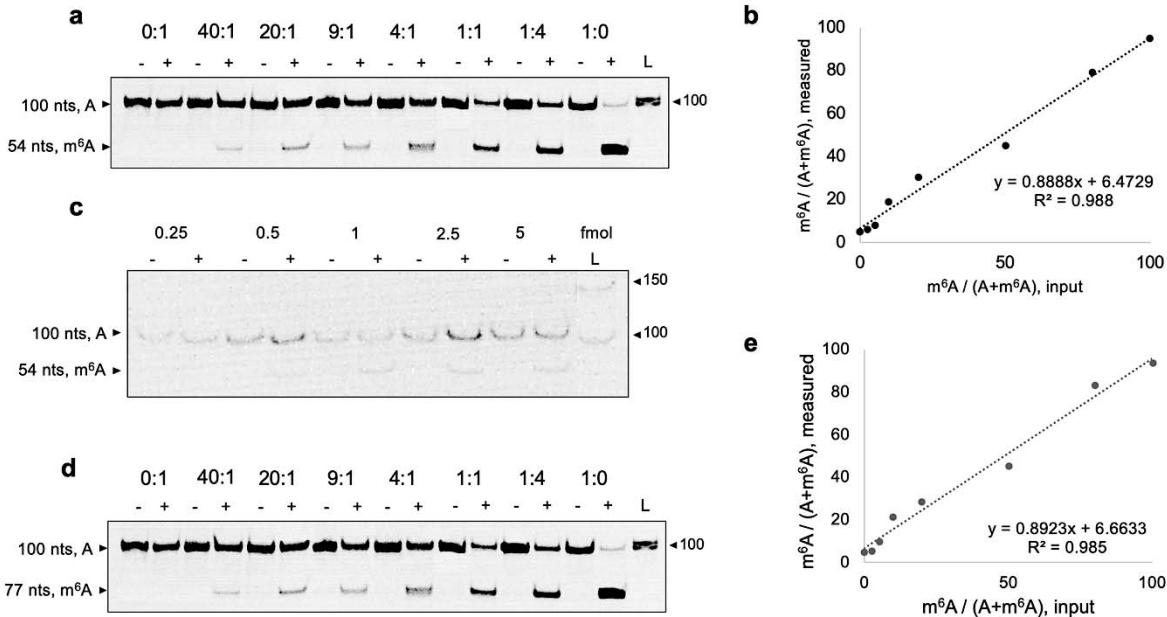

181

182 **Figure 2. The calibration curves for SLAP analysis of PAN and MALAT1 lncRNAs.** a, To estimate the  $m^6A$   
183 stoichiometry on target RNA, it is necessary to establish the proper calibration curve. We combined 100 nt in vitro  
184 synthesized  $m^6A$  modified (nucleotide (nt) position 82 on PAN RNA and nt position 65 on MALAT1) and unmodified  
185 RNA standards at the following ratios (0:1, 40:1, 20:1, 9:1, 4:1, 1:1, 1:4, and 1:0), that reflected the modification  
186 percentage (0, 2.5, 5, 10, 20, 50, 80, and 100%, respectively) for the total of 30 femtomole, and spiked them with the



187 1 µg total RNA extracts. Native polyacrylamide gel (PAGE) shows two products corresponding to the m<sup>6</sup>A modified  
188 (54 nts) and unmodified (100 nts) PAN RNA standards that were combined at indicated ratios and directed to SLAP  
189 analysis. Positive reactions included SedTTP in RT reactions, while negative reactions included dTTP instead. The  
190 intensity of these products was quantified to generate the calibration curve shown in panel **b**, which showed linear  
191 regression of  $R^2 = 0.988$ . **c**, Native PAGE showing two products corresponding to the modified (54 nts) and  
192 unmodified (100 nts) standard RNAs that were combined at equal ratio at the indicated total concentrations (0.25 – 5  
193 femtomole) and directed to the SLAP analysis to assess the method's sensitivity. **d**, Native PAGE gel showing two  
194 products derived from the m<sup>6</sup>A modified (77 nts) and unmodified (100 nts) MALAT1 RNA standards that were  
195 combined at specific ratios and directed to the SLAP analysis. **e**, The intensity of the products from panel d was  
196 quantified to generate the calibration curve, which showed linear regression of  $R^2 = 0.89$ .  
197

## 198 **Stoichiometric analysis of m<sup>6</sup>A on PAN RNA**

199 After establishing the proper calibration curve, we proceeded to the quantification of m<sup>6</sup>A frequency  
200 on PAN RNA at three selected nt positions, i.e., 18, 203 and 1041, which, according to our previous next  
201 generation epitranscriptomic analysis, are modified during uninduced (0 hours post-induction, h pi) and  
202 late lytic (48 h pi) stages of KSHV replication (Martin et al. 2021). We included the analysis of two  
203 unmodified adenines on PAN RNA, at nt positions 366 and 410, as negative controls (Figure 3a). Here,  
204 the analysis did not yield m<sup>6</sup>A-specific products, verifying the SLAP specificity.

205 Due to the proximity of m<sup>6</sup>A at nt position 18 to the 5' terminus, analysis of that site required the use  
206 of extended splint-adapter oligonucleotide duplex containing the forward primer binding site (extension  
207 follows the CCATTG insert and proceed the 3' end sequence that is reverse complement to the forward  
208 primer, see Materials and Methods section for details), that would allow size-specific differentiation of  
209 modified and unmodified products. As a result, the m<sup>6</sup>A-specific product corresponding to that site is 42  
210 nts longer (the total length of 202 nts) than the product corresponding to unmodified residue (160 nt)  
211 (Figure 3b). For nt positions 203 and 1041, the size of the products corresponding to modified and  
212 unmodified RNA fractions was 103 and 75, respectively (Figure 3b).

213 The m<sup>6</sup>A at position 18 was estimated at 31.4±3.5% during uninduced stage of KSHV replication,  
214 followed by an increase to 56.6±2.7% during late lytic phase of infection (Figure 3c). The modification  
215 level at nt 203 was estimated at 3.4±4.8% during uninduced stage, followed by an increase to 52.2±5.2%  
216 during the late lytic stage (Figure 3c). Nucleotide 1041 was modified at 10.8±5.2% during uninduced  
217 stage and showed the highest modification frequency during the late lytic stage, reaching a frequency of  
218 57.4±5.3% (Figure 3c).

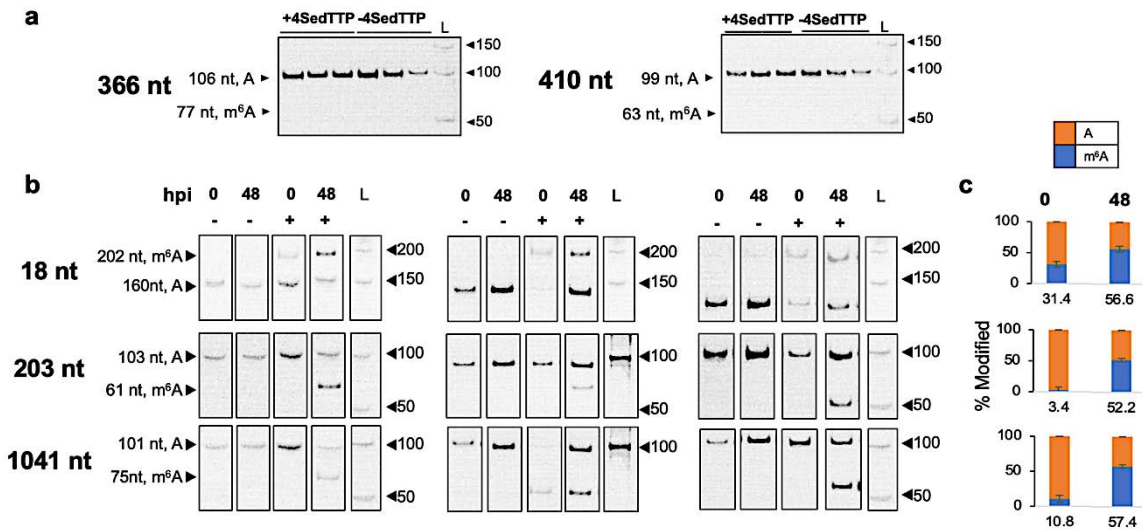

219

220 **Figure 3. The SLAP analysis of m<sup>6</sup>A stoichiometry on PAN RNA.** **a**, Native PAGE showing one product  
 221 corresponding to the unmodified adenines at nt position 366 and 410 that served as negative controls. The position  
 222 of expected products specific for modified and unmodified sites are indicated on all electropherograms. L stands for  
 223 50 bp DNA ladder. **b**, Native PAGE for representative three biological replicates of the SLAP analysis performed on  
 224 PAN RNA for adenines at nt positions 18, 203, and 1041. **c**, The column graphs represent the average m<sup>6</sup>A  
 225 modification frequency at nt positions 18, 203, and 1041. Standard deviations for frequency measurements are  
 226 indicated.

227

### 228 Stoichiometric analysis of m<sup>6</sup>A on MALAT1

229 We used the SLAP analysis to estimate the modification frequency of two previously identified m<sup>6</sup>A at  
 230 nt 2515 and 2698 on MALAT1 expressed during uninduced (0 h pi) and late lytic (48 h pi) phases of  
 231 KSHV replication. We included the analysis of unmodified adenine at nt position 2674 as a control ([Figure](#)  
 232 [4a](#)). Previous application of the SCARLET analysis indicated that MALAT1 is modified at nt 2515 at 41%  
 233 frequency in HEK293T cells (Liu et al. 2013b). In our studies, we found that the modification frequency of  
 234 this position is dynamic and varies depending upon KSHV replication stage. During the uninduced stage,  
 235 nt 2515 was modified at 9.28±8.28% frequency, however, the progression of viral lytic replication led to  
 236 the increased m<sup>6</sup>A frequency to 20.39 ±6.78% in BCBL-1 cells ([Figure 4c](#)). The SCARLET analysis of  
 237 another site on MALAT1 at nt 2698 indicated the modification frequency at 3.77±0.23%. In the SLAP  
 238 analysis, this position was found to be modified at 3.77±0.23% during the uninduced stage of KSHV  
 239 replication, while during lytic replication the frequency increased to 7.76±0.54% in BCBL-1 cells ([Figure](#)  
 240 [4c](#)). The observed varying levels of m<sup>6</sup>A on both analyzed lncRNAs highlight the dynamic nature of these

241 modifications and the need for precise frequency estimation that can inform about the functionality of a  
 242 given modified site.  
 243

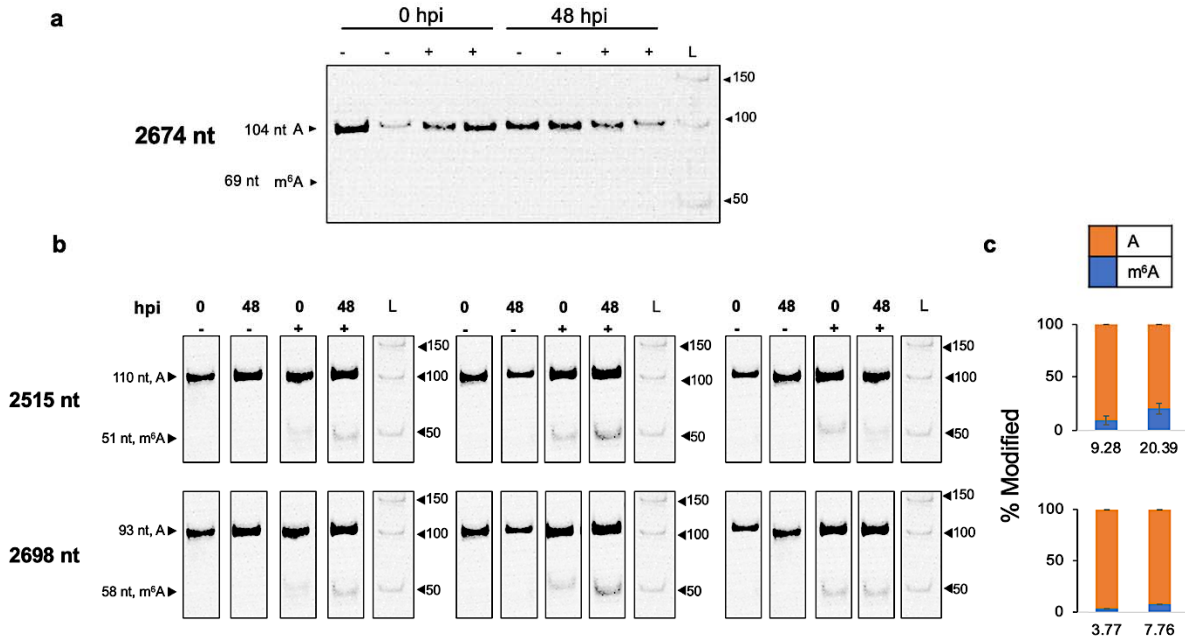

244

245 **Figure 4 The stoichiometric analysis of m<sup>6</sup>A on MALAT1.** **a**, Native PAGE showing one product (nts 104)  
 246 corresponding to the unmodified adenine at nt position 2674 that served as a negative control. The position of  
 247 expected products specific for modified and unmodified sites are indicated on all electropherograms. L stands for 50  
 248 bp DNA ladder. **b**, Native PAGE for representative three biological replicates of the SLAP analysis performed on  
 249 MALAT1 for adenines at nt positions 2515 and 2698. **c**, The column graphs represent the average m<sup>6</sup>A modification  
 250 frequency on MALAT1 RNA at nt positions 2515, and 2698. Standard deviations for frequency measurements are  
 251 indicated.  
 252

## 253 DISCUSSION

254 Establishing a biochemical framework that allows the identification and measurable characterization  
 255 of RNA epitranscriptomic modifications to complement the existing transcriptome-wide datasets, is critical  
 256 for understanding RNA functionality and modes by which it is tuned in response to various environmental  
 257 stimuli. The stoichiometry of modification at a given site can reflect the biological significance of that  
 258 residue, as these versatile chemical tags have been shown to influence almost every aspect of RNA  
 259 biology, e.g., structure, stability, metabolism, and interactions with effectors. It is currently unclear whether  
 260 epitranscriptomic modifications of some target RNAs, e.g., less abundant cellular RNAs or viral  
 261 transcripts, result from off-target activities of modifying cellular enzymes, or if they represent a new layer

262 of post-transcriptional control. However, considering their extensive influence over RNA biology, they  
263 should be regarded as an additional layer of molecular code that governs specific biological effects at the  
264 cellular and organismal levels.

265 Here, we present the application of a newly developed antibody-independent method, termed the  
266 SLAP, to measure the m<sup>6</sup>A stoichiometry on two exemplary lncRNAs, PAN RNA and MALAT1, both of  
267 which have been previously reported as m<sup>6</sup>A modified (Martin et al. 2021; Liu et al. 2013a). We show that  
268 the application of SLAP is not limited to a specific type of RNA in question, as we were able to obtain  
269 quantitative measurement of m<sup>6</sup>A levels for transcripts of viral and cellular origin. The SLAP relies on the  
270 use of site-specific oligonucleotides to “read” the modification stoichiometry regardless of its position, i.e.,  
271 inside, or outside of the consensus RRACH motif. As such, we were able to determine the frequency of  
272 modification for adenines located within motifs “AAC” (nt 203 and 1041) and “CAC” (nt 18) on PAN RNA,  
273 and within motifs “GAC” (nt 2515) and “AAC” (nt 2698) on MALAT1. This is particularly critical for the  
274 analysis of m<sup>6</sup>A residues that were found outside the canonical consensus sequence in human (Linder et  
275 al. 2015), viral (Baquero-Perez et al. 2019), bacterial (Deng et al. 2015), and plant (Y et al. 2014; Wei et  
276 al. 2018) transcriptomes.

277 The SLAP method does not require large amounts of input material. Our analysis indicated that as  
278 little as  $2.98 \times 10^8$  copies of PAN RNA and  $4 \times 10^7$  copies of MALAT1 can be used to yield the accurate  
279 estimates of modification frequency on transcripts expressed in living cells. Considering the PAN RNA  
280 and MALAT1 transcripts’ average copy number per cell, this translates to approximately 600 cells. Also,  
281 using in vitro synthesized RNA standards, that we can fully control in terms of abundance and  
282 modification fraction, we were able to quantify the modification on target transcript that was present at  
283 500 attomolar concentration ( $5.5 \times 10^8$  copies), and the modification percentage as low as 2.5% ( $4.5 \times 10^8$   
284 copies of modified transcripts). For the assessment of other less abundant transcripts, one can scale up  
285 the amount of input material to obtain results of comparable accuracy.

286 The SLAP includes relatively small number of methodological steps that are rooted in traditional  
287 molecular biology techniques, involving total RNA extraction, phosphorylation, reverse transcription, RNA  
288 hydrolysis, ligation, PCR, and densitometric assessment of quantitative data. Further, the deconvolution  
289 of data resulting from the SLAP does not require an extensive bioinformatic background, unlike most

290 deep-sequencing techniques. On average it takes 2 - 3 days from the isolation of the total RNA to the  
291 stoichiometric results. In comparison, other methods, e.g., m<sup>6</sup>A mapping by next generation sequencing  
292 methods (Linder et al. 2015; Grozhik et al. 2017; Dominissini et al. 2013; Molinie et al. 2016) are burden  
293 with many laborious steps that are required for cDNA library preparation followed by the bioinformatic  
294 analysis of obtained sequencing reads. Also, the SCARLET method, although can precisely determine  
295 m<sup>6</sup>A modification sites at single-nucleotide resolution, is time consuming, laborious, and it requires the  
296 use of radioactivity. Hence, the SLAP method offers an attractive alternative that has low cost and  
297 requires low time contribution or expertise.

298 The epitranscriptomic field is quickly opening a new chapter in RNA biology field, advancing through  
299 the discovery of novel modifications to their biological functions in many molecular processes but also  
300 human pathogenesis. It has been estimated that the defects in RNA modifications account for over 100  
301 human disorders that include childhood-onset multiorgan failures, cancers, metabolic, and neurologic  
302 diseases (Suzuki 2020; Jonkhout et al. 2017). These conditions are now referred to as “RNA  
303 modopathies”, and the extent to which their severity is defined by the disruption of epitranscriptomic  
304 processes is under careful examination. The next horizon for this quickly progressing field is to establish a  
305 molecular level view of how these chemical tags define their influence over single transcript, whole  
306 transcriptome, cellular processes, and phenotypic consequences. We now realize that RNA sequences  
307 and structures with their modifications comprise the complete information content of the RNA. They are  
308 needed to usher in an era of molecular and clinical studies that are based on a solid foundation of  
309 sequences and structures.

310

## 311 **MATERIALS & METHODS**

### 312 **Oligonucleotide Design**

313 The analysis of each modified adenine requires the design of four oligonucleotides: 1) an  
314 oligonucleotide primer with a minimum length of 20 nts and matching the region located at least 50 nts  
315 downstream of the target m<sup>6</sup>A. This reverse primer (Figure 5a) binds the modified RNA template and  
316 serves as a starting point for synthesis of a new copy DNA (cDNA) during reverse transcription (RT)  
317 reaction. Since RT reaction takes place in the presence of 4SedTTP, it can yield two types of products: a

318 truncated “RT-stop” product marking the position of m<sup>6</sup>A, and a full-length product corresponding to the  
319 unmodified RNA fraction (Figure 5b). 2) the forward primer (Figure 5a) with a minimum length of 20 nts,  
320 that holds complementarity to the region located at least 25 nts upstream of the target m<sup>6</sup>A, which allows  
321 the simultaneous amplification of both types of products. 3) the 5' phosphorylated adapter oligonucleotide  
322 containing CCATTG insert at the 5' end (Figure 5c), while its 3' end contains sequence that is reverse  
323 complement to the forward primer binding site. 4) the splint oligonucleotide (Figure 5c), which 5' end is  
324 reverse complement to the adapter sequence necessary for duplex formation (including the adapter's  
325 CCATTG insert, and forward primer binding site), followed by the sequence that is reverse complement to  
326 the 10 nts downstream of the target m<sup>6</sup>A site (not including the modified residue), and the 3' end, that  
327 includes the 3' C3 spacer phosphoramidite (SpC3). The SpC3 modification introduces a long hydrophilic  
328 spacer arm for the ligation of the phosphorylated adapter. As a result of ligation reaction, both RT-stop  
329 and full-length products will include common reverse and forward primer binding sites that support their  
330 simultaneous PCR amplification. Altogether, the total length of ligated adapter, splint and RT-stop product  
331 should not approximate the size of full-length product to allow the size-specific discrimination; thus, we  
332 recommend at least 25 nt difference between both. For target adenines that are located near the 5' end of  
333 modified RNA (within 50 nts, as for m<sup>6</sup>A at position 18 in PAN RNA), the design of extended splint  
334 oligonucleotides is required to adequately differentiate between RT-stop and full-sized products. This can  
335 be accomplished by the addition of non-template specific sequence to the adapter oligonucleotide that will  
336 follow the CCATTG insert and proceed the 3' end sequence that is reverse complement to the forward  
337 primer.



353 Glutamine at 37 °C in 5% CO<sub>2</sub>. The induction of KSHV lytic infection was performed by treating 2 x 10<sup>7</sup>  
354 BCBL-1 cells with sodium butyrate (NaB, EMD Millipore 654833) to a final concentration of 0.3 mM. Cells  
355 were collected before (0 h post induction, h pi) and after induction (48 h pi).

356

#### 357 **RNA extraction**

358 Total RNA was isolated from 2x10<sup>7</sup> BCBL-1 cells using TRIzol™ (ThermoFisher 15596026), followed  
359 by DNase I treatment (ThermoFisher AM1907), and RNA purification using RNA Clean & Concentrator-5.  
360 RNA was eluted in of RNase/DNase-free water and stored at -80°C.

361

#### 362 **5' Phosphorylation of total RNA**

363 The 5' end phosphorylation was performed by treating 10 µg of total RNA extract with 0.5 µl of RNase  
364 inhibitor (20U final, NEB M0307L), 1 µl of 10x T4 PNK reaction buffer, 1 µl 0.1 mM ATP, and 1 µl of T4  
365 Polynucleotide kinase (10U final) in 10 µl total volume for 30 min at 37 °C. RNA was ethanol precipitation  
366 by adding 160 µl of 50 mM KOAc, pH 7, 200 mM KCl, 3 µl of 5 µg/µl Glycogen, and 550 µl 100% ethanol  
367 and stored at -20°C. The samples were centrifuged at 12,000 x g for 30 minutes, the pellet was washed  
368 with 500 µl of 75% ethanol and dissolved in 13.5 µl of RNase/DNase-free water.

369

#### 370 **4SedTTP reverse transcription**

371 The reverse transcription reaction included 13.5 µl of the phosphorylation reaction that was initially  
372 combined with 1 µl 10x annealing buffer (250 mM Tris-HCl, pH 7.4, 480 mM KCl), and 1 µl 0.5 pmol RT  
373 oligonucleotide primer (Table 1) in the total volume of 15.5 µl. The reaction was incubated for 2 min at  
374 95°C. For 4SedTTP reactions, 2 µl of 10X 4SedTTP reaction buffer (500 mM Tris-HCl pH 8.0, 500 mM  
375 KCl, 50 mM MgCl<sub>2</sub>, 100 mM DTT), 1 µl of 800 µM dATP, dCTP, dGTP, 4SedTTP (final concentration of 80  
376 µM for each), 0.5 µl RNase Inhibitor (80U final, NEB M0307L) and 1 µl AMV RT (12U final, ThermoFisher  
377 18080044) were added to each reaction for a final volume of 20 µl. The reactions were incubated for 1 h  
378 at 42°C and 5 min at 85°C to inactivate the reverse transcriptase. To remove RNA template, 1 µl RNase H  
379 (5U final, NEB M0297L) was added directly to each reaction and incubation for 20 min at 37°C. RNase H  
380 was inactivated by incubating for 5 min at 85°C. For dTTP reactions, the above protocol was performed



381 except for the replacement of 4SedTTP with 800  $\mu\text{M}$  dTTP (80  $\mu\text{M}$  final concentration) during RT  
382 reactions

383

### 384 **Annealing and ligation**

385 The adapters and splint oligonucleotides were combined at 1:1 ratio, at a concentration of 1.5  $\mu\text{M}$   
386 each. 1.5 pmol (1  $\mu\text{l}$ ) of the adapter/splint oligonucleotides mixture was added to 20  $\mu\text{l}$  RT reaction  
387 followed by incubation for 3 min at 75°C to facilitate the annealing of splint oligonucleotide to RT-stop  
388 products and the adapter to the splint oligonucleotide. Next, to ligate the adapter to the RT-stop product,  
389 0.4  $\mu\text{l}$  of 10 U/ $\mu\text{l}$  T4 DNA ligase (4U final, NEB M0202L), 1X T4 DNA ligase reaction buffer, and 2  $\mu\text{l}$  100%  
390 DMSO were added to the total volume of 25  $\mu\text{l}$  and incubated overnight at 16 °C. The DNA ligase was  
391 inactivated by incubating the reaction for 10 min at 65°C.

392

### 393 **PCR Amplification of RT-stop and full-length products**

394 To amplify both RT-stop and full-length products, 2  $\mu\text{l}$  of the ligation reaction was combined with 10  $\mu\text{l}$   
395 HiFi Buffer (-Mg<sup>2+</sup>), 2  $\mu\text{l}$  10 mM dNTPs, 4  $\mu\text{l}$  50 mM MgCl<sub>2</sub>, 2  $\mu\text{l}$  10  $\mu\text{M}$  forward primer, 2  $\mu\text{l}$  10  $\mu\text{M}$   
396 RT/reverse primer, 71.6  $\mu\text{l}$  water, 0.4  $\mu\text{l}$  Platinum Taq High Fidelity DNA Polymerase (2U final,  
397 ThermoFisher 11304011) in 25  $\mu\text{l}$  total. The reaction was initially denatured for 30s at 94°C, followed by  
398 35 cycles of denaturation for 10s at 94°C, annealing for 20s at 67°C, and extension for 20s at 72°C. The  
399 final extension was set for 5 min at 72°C.

400

### 401 **Native polyacrylamide gel electrophoresis and densitometric analysis**

402 The PCR products were separated on 10% native polyacrylamide gel (PAGE) that was set by  
403 combining 9.67 ml RNase/DNase-free water, 1.5 ml 10x Tris-Borate-EDTA buffer (10x TBE, pH 8.3), 3.75  
404 ml 40% Acrylamide/Bisacrylamide (19:1), 75  $\mu\text{l}$  10% ammonium persulfate, and 7.5  $\mu\text{l}$  N,N,N',N'-  
405 tetramethylethylenediamine (TEMED). After combining samples with a gel loading buffer, which consisted  
406 of 30% (v/v) glycerol, and 0.25% (w/v) bromophenol blue, the samples were loaded on the gel. The PAGE  
407 was run for 2 h at 120V in 1X TBE buffer. The gel was stained by incubating with 1x ethidium bromide  
408 solution in 1x TBE overnight at 4 °C (Zhang et al. 2019). Gels were visualized using the Benchtop 3UV

409 Transilluminator and GelDoc-IT Imager. Densitometric analysis was performed using ImageJ v1.52a  
 410 (Abràmoff et al. 2006) on inverted TIFF files. Rectangular boxes were drawn around each band, and the  
 411 measure function was used to determine their pixel density. Background was determined by densitometry  
 412 measurements of three randomly chosen areas located near the area where the RT-stop products would  
 413 be expected in (-)4SedTTP reactions. This measurement was subtracted from the experimental pixel  
 414 density measurements. The stoichiometric measurements of m<sup>6</sup>A were visualized as bar graphs using  
 415 Excel spreadsheet. Measured values corresponding to RT-stop and full-length PCR products were used  
 416 to calculate percent yield using the following formula:

$$\text{Percent Yield} = \frac{RT\_stop, measured}{(full\_length, measured + RT\_stop, measured)} \times 100$$

417

## 418 TABLES

419 **Table 1. The SLAP oligonucleotides**

| Samples                                                               | Primers                | Sequence 5'-3'                   |
|-----------------------------------------------------------------------|------------------------|----------------------------------|
| Primers used for the SLAP analysis of PAN RNA at nt 18, 203, and 1041 | Reverse/RT 18          | GACTGGGCAGTCCCAGT                |
|                                                                       | Splint 18              | CCAGTCCATGGCCTTGGCTGC/3SpC3      |
|                                                                       | Adapter 18             | /5Sp9/CATGGAAGCGGCAAGAAGGCAAGCAG |
|                                                                       | Reverse/RT 203         | TGGGCAAATCGCAGCTTTTGT            |
|                                                                       | Splint 203             | GCCCACATGGCACCGCGCGG/3SpC3       |
|                                                                       | Adapter 203            | /5Sp9/CATGGAATGTGGGAAAAGTAGGACGG |
|                                                                       | Forward 203            | TCCGTCCTACTTTTCCCACATT           |
|                                                                       | Reverse/RT 1041        | TATGGATTAACATTGACCTT             |
|                                                                       | Adapter 1041           | /5Sp9/CATGGTTAGTTTAATTTGAGCTCTAG |
|                                                                       | Splint 1041            | CCATACATGGCTTACAAC/3SpC3         |
| Primers for PAN RNA Standard at nt 135                                | Reverse/RT Control 135 | CCAAAAGCGACGCAATCAACC            |

|                                                                  |                      |                                 |
|------------------------------------------------------------------|----------------------|---------------------------------|
|                                                                  | Splint Control 135   | TTTGGCATGGTTGGTGCC/3SpC3        |
|                                                                  | Adapter Control 135  | /5Sp9/CATGGGAAAACAGAAG          |
|                                                                  | Forward Control 135  | CTTCTGTTTTTC                    |
| Primers for PAN RNA Negative Controls; nt 366, nt 410            | Forward Control 1    | CCTTGCCATGGCAACTATACAG          |
|                                                                  | Splint Control 1     | ATACAGCAATGGCGTGTCTGAA/3SpC3    |
|                                                                  | Adaptor Control 1    | p-CCATTGCTGTATAGTTGCCATGGCAAGG  |
|                                                                  | Reverse/RT Control 1 | GGTAGTGCACCACTGTTCTGATAC        |
|                                                                  | Forward Control 2    | GCAACTATACAGTCACCCC             |
|                                                                  | Splint Control 2     | TCACCCCAATGGCTGGTGTATC/3SpC3    |
|                                                                  | Adaptor Control 2    | p-CCATTGGGGGTGACTGTATAGTTGC     |
|                                                                  | Reverse/RT Control 2 | CCGAAACAACGAATGAGCAG            |
| Primers used for the SLAP analysis of MALAT1 at nt 2515 and 2698 | Reverse/RT 2515      | CAAAGTCCAATGCAAAAACATT          |
|                                                                  | Splint 2515          | GGAAGAGCAATGGCTTTTCGTAAC/3SpC3  |
|                                                                  | Adaptor 2515         | p-CCATTGCTCTTCCAAAAGCCTTCTGC    |
|                                                                  | Forward 2515         | GCAGAAGGCTTTTGGAGAG             |
|                                                                  | Reverse/RT 2698      | CTATCTTACCACGAACTGCTGC          |
|                                                                  | Splint 2698          | AATTTGACCAATGGCCAGTGTGTTG/3SpC3 |
|                                                                  | Adaptor 2698         | p-CCATTGGTCAATTAATGCTAGTCCTC    |
|                                                                  | Forward 2698         | GAGGACTAGCATTAAATTGAC           |

|                                                                |                      |                               |
|----------------------------------------------------------------|----------------------|-------------------------------|
| Primers for MALAT1 m <sup>6</sup> A Negative Controls; nt 2674 | Reverse/RT Control 3 | GCTCGCTTGCTCCTCAGTCC          |
|                                                                | Splint Control 3     | GTTAAGCAATGGCAGCAGCAGAC/3SpC3 |
|                                                                | Adaptor Control 3    | p-CCATTGCTTAACTCAAAGTCCAATGC  |
|                                                                | Forward Control 3    | GCATTGGACTTTGAGTTAAG          |

420

## 421 Acknowledgement

422 Research reported in this publication and S.E.M., H.G., and J.S.S. were supported by the start-up  
423 funds from the Department of Biological Sciences, College of Science and Mathematics, and Office of the  
424 Vice President for Research, Auburn University, and by the National Institute of Allergy and Infectious  
425 Disease (NIAID) under award number R21AI159361. The content is solely the responsibility of the  
426 authors and does not necessarily represent the official views of the National Institutes of Health.

427

## 428 REFERENCES

- 429 Abràmoff MD, Magalhães PJ, Ram SJ. 2006. Image Processing with ImageJ. In *Optical Imaging Techniques in Cell*  
430 *Biology*, pp. 249–258, CRC Press.
- 431 Arun G, Aggarwal D, Spector DL. 2020. MALAT1 Long Non-Coding RNA: Functional Implications. *Non-Coding RNA* **6**.  
432 /pmc/articles/PMC7344863/ (Accessed September 14, 2021).
- 433 Baquero-Perez B, Antanaviciute A, Yonchev ID, Carr IM, Wilson SA, Whitehouse A. 2019. The tudor SND1 protein is  
434 an m6a RNA reader essential for replication of kaposi's sarcoma-associated herpesvirus. *eLife* **8**.
- 435 Baquero-Perez B, Geers D, Díez J. 2021. From A to m6A: The Emerging Viral Epitranscriptome. *Viruses* **13**: 1049.  
436 <https://www.mdpi.com/1999-4915/13/6/1049> (Accessed June 24, 2021).
- 437 Bartosovic M, Molares HC, Gregorova P, Hrossova D, Kudla G, Vanacova S. 2017. N6-methyladenosine demethylase  
438 FTO targets pre-mRNAs and regulates alternative splicing and 3'-end processing. *Nucleic acids research* **45**:  
439 11356–11370. <http://www.ncbi.nlm.nih.gov/pubmed/28977517> (Accessed October 30, 2019).
- 440 Bokar JA. 2005. The biosynthesis and functional roles of methylated nucleosides in eukaryotic mRNA. 141–177.  
441 <https://link.springer.com/chapter/10.1007/b106365> (Accessed July 13, 2021).
- 442 Bokar JA, Shambaugh ME, Polayes D, Matera AG, Rottman FM. 1997. Purification and cDNA cloning of the AdoMet-  
443 binding subunit of the human mRNA (N6-adenosine)-methyltransferase. *RNA* **3**: 1233–1247.  
444 <http://www.rnajournal.org/cgi/content/abstract/3/11/1233#otherarticles> (Accessed August 30, 2020).
- 445 Coker H, Wei G, Brockdorff N. 2019. m6A modification of non-coding RNA and the control of mammalian gene  
446 expression. *Biochimica et Biophysica Acta - Gene Regulatory Mechanisms* **1862**: 310–318.
- 447 Deng X, Chen K, Luo G-Z, Weng X, Ji Q, Zhou T, He C. 2015. Widespread occurrence of N6-methyladenosine in  
448 bacterial mRNA. *Nucleic Acids Research* **43**: 6557. /pmc/articles/PMC4513869/ (Accessed September 15,  
449 2021).
- 450 Dominissini D, Moshitch-Moshkovitz S, Salmon-Divon M, Amariglio N, Rechavi G. 2013. Transcriptome-wide  
451 mapping of N6-methyladenosine by m6A-seq based on immunocapturing and massively parallel sequencing.

- 452 *Nature Protocols* 2013 8:1 8: 176–189. <https://www.nature.com/articles/nprot.2012.148> (Accessed  
453 September 14, 2021).
- 454 Dominissini D, Moshitch-Moshkovitz S, Schwartz S, Salmon-Divon M, Ungar L, Osenberg S, Cesarkas K, Jacob-Hirsch  
455 J, Amariglio N, Kupiec M, et al. 2012. Topology of the human and mouse m6A RNA methylomes revealed by  
456 m6A-seq. *Nature* **485**: 201–206. <https://www.nature.com/articles/nature11112> (Accessed May 12, 2021).
- 457 Grozhik A v., Linder B, Olarerin-George AO, Jaffrey SR. 2017. Mapping m6A at individual-nucleotide resolution using  
458 crosslinking and immunoprecipitation (miCLIP). *Methods in molecular biology (Clifton, NJ)* **1562**: 55.  
459 </pmc/articles/PMC5562447/> (Accessed July 13, 2021).
- 460 He RZ, Jiang J, Luo DX. 2020. The functions of N6-methyladenosine modification in lncRNAs. *Genes & Diseases* **7**:  
461 598–605.
- 462 Hong T, Yuan Y, Chen Z, Xi K, Wang T, Xie Y, He Z, Su H, Zhou Y, Tan ZJ, et al. 2018. Precise Antibody-Independent  
463 m6A Identification via 4SedTTP-Involved and FTO-Assisted Strategy at Single-Nucleotide Resolution. *Journal*  
464 *of the American Chemical Society* **140**: 5886–5889. <https://pubs.acs.org/sharingguidelines> (Accessed October  
465 30, 2019).
- 466 Jiang X, Liu B, Nie Z, Duan L, Xiong Q, Jin Z, Yang C, Chen Y. 2021. The role of m6A modification in the biological  
467 functions and diseases. *Signal Transduction and Targeted Therapy* **6**: 1–16. [https://doi.org/10.1038/s41392-](https://doi.org/10.1038/s41392-020-00450-x)  
468 [020-00450-x](https://doi.org/10.1038/s41392-020-00450-x) (Accessed May 2, 2021).
- 469 Jonkhout N, Tran J, Smith MA, Schonrock N, Mattick JS, Novoa EM. 2017. The RNA modification landscape in  
470 human disease. *RNA* **23**: 1754. </pmc/articles/PMC5688997/> (Accessed September 14, 2021).
- 471 Kane SE, Beemon K. 1985. Precise localization of m6A in Rous sarcoma virus RNA reveals clustering of methylation  
472 sites: implications for RNA processing. *Molecular and Cellular Biology* **5**: 2298–2306.  
473 <https://pubmed.ncbi.nlm.nih.gov/3016525/> (Accessed September 16, 2020).
- 474 KD M, Y S, P Z, O E, CE M, SR J. 2012. Comprehensive analysis of mRNA methylation reveals enrichment in 3' UTRs  
475 and near stop codons. *Cell* **149**: 1635–1646. <https://pubmed.ncbi.nlm.nih.gov/22608085/> (Accessed  
476 September 14, 2021).
- 477 Linder B, Grozhik A v., Olarerin-George AO, Meydan C, Mason CE, Jaffrey SR. 2015. Single-nucleotide-resolution  
478 mapping of m6A and m6Am throughout the transcriptome. *Nature Methods* **12**: 767–772.  
479 <https://www.nature.com/articles/nmeth.3453> (Accessed May 12, 2021).
- 480 Liu J, Yue Y, Han D, Wang X, Fu Y, Zhang L, Jia G, Yu M, Lu Z, Deng X, et al. 2014. A METTL3-METTL14 complex  
481 mediates mammalian nuclear RNA N6-adenosine methylation. *Nature chemical biology* **10**: 93–95.  
482 <https://www.nature.com/articles/nchembio.1432> (Accessed August 20, 2020).
- 483 Liu N, Parisien M, Dai Q, Zheng G, He C, Pan T. 2013a. Probing N6-methyladenosine RNA modification status at  
484 single nucleotide resolution in mRNA and long noncoding RNA. *RNA* **19**: 1848. </pmc/articles/PMC3884656/>  
485 (Accessed September 4, 2021).
- 486 Liu N, Parisien M, Dai Q, Zheng G, He C, Pan T. 2013b. Probing N6-methyladenosine RNA modification status at  
487 single nucleotide resolution in mRNA and long noncoding RNA. *RNA* **19**: 1848–1856.  
488 </pmc/articles/PMC3884656/?report=abstract> (Accessed September 7, 2020).
- 489 Lu Z, Guo JK, Wei Y, Dou DR, Zarnegar B, Ma Q, Li R, Zhao Y, Liu F, Choudhry H, et al. 2020. Structural modularity of  
490 the XIST ribonucleoprotein complex. *Nature Communications* 2020 11:1 11: 1–14.  
491 <https://www.nature.com/articles/s41467-020-20040-3> (Accessed July 20, 2021).
- 492 Mao Y, Dong L, Liu X-M, Guo J, Ma H, Shen B, Qian S-B. 2019. m 6 A in mRNA coding regions promotes translation  
493 via the RNA helicase-containing YTHDC2. *Nature Communications* 2019 10:1 10: 1–11.  
494 <https://www.nature.com/articles/s41467-019-13317-9> (Accessed July 20, 2021).
- 495 Martin SE, Gan H, Toomer G, Sridhar N, Sztuba-Solinska J. 2021. The m6A landscape of polyadenylated nuclear  
496 (PAN) RNA and its related methylome in the context of KSHV replication. *RNA rna.078777.121*.  
497 <http://rnajournal.cshlp.org/content/early/2021/06/29/rna.078777.121> (Accessed July 13, 2021).
- 498 Mateusz Mendel A, Chen K-M, Homolka D, Gos P, Raman Pandey R, McCarthy AA, Pillai RS, Mendel M. 2018.  
499 Methylation of Structured RNA by the m 6 A Writer METTL16 Is Essential for Mouse Embryonic Development  
500 Article Methylation of Structured RNA by the m 6 A Writer METTL16 Is Essential for Mouse Embryonic  
501 Development Internal modification of RNAs with N 6. *Molecular Cell* **71**: 986–1000.
- 502 McIntyre W, Netzband R, Bonenfant G, Biegel JM, Miller C, Fuchs G, Henderson E, Arra M, Canki M, Fabris D, et al.  
503 2018. Positive-sense RNA viruses reveal the complexity and dynamics of the cellular and viral

- 504 epitranscriptomes during infection. *Nucleic Acids Research* **46**: 5776–5791.  
505 <https://pubmed.ncbi.nlm.nih.gov/29373715/> (Accessed September 16, 2020).
- 506 Mendel M, Delaney K, Pandey RR, Chen K-M, Wenda JM, Vågbo CB, Steiner FA, Homolka D, Pillai RS. 2021. Splice  
507 site m6A methylation prevents binding of U2AF35 to inhibit RNA splicing. *Cell* **184**: 3125–3142.e25.
- 508 Meyer KD, Patil DP, Zhou J, Zinoviev A, Skabkin MA, Elemento O, Pestova T v., Qian SB, Jaffrey SR. 2015. 5' UTR m6A  
509 Promotes Cap-Independent Translation. *Cell* **163**: 999–1010.
- 510 Meyer KD, Saletore Y, Zumbo P, Elemento O, Mason CE, Jaffrey SR. 2012. Comprehensive analysis of mRNA  
511 methylation reveals enrichment in 3' UTRs and near stop codons. *Cell* **149**: 1635–1646.  
512 <https://pubmed.ncbi.nlm.nih.gov/22608085/> (Accessed June 17, 2021).
- 513 Molinie B, Wang J, Lim KS, Hillebrand R, Lu Z, van Wittenberghe N, Howard BD, Daneshvar K, Mullen AC, Dedon P, et  
514 al. 2016. m6A-LAIC-seq reveals the census and complexity of the m6A epitranscriptome. *Nature Methods*  
515 *2016 13:8 13*: 692–698. <https://www.nature.com/articles/nmeth.3898> (Accessed September 4, 2021).
- 516 Rossetto CC, Pari GS. 2014. PAN's labyrinth: Molecular biology of kaposi's sarcoma-associated herpesvirus (KSHV)  
517 PAN RNA, a multifunctional long noncoding RNA. *Viruses* **6**: 4212–4226.
- 518 Schwartz S, Mumbach MR, Jovanovic M, Wang T, Maciag K, Bushkin GG, Mertins P, Ter-Ovanesyan D, Habib N,  
519 Cacchiarelli D, et al. 2014. Perturbation of m6A writers reveals two distinct classes of mRNA methylation at  
520 internal and 5' sites. *Cell Reports* **8**: 284–296. [/pmc/articles/PMC4142486/?report=abstract](https://pubmed.ncbi.nlm.nih.gov/25483034/) (Accessed August  
521 30, 2020).
- 522 Śledź P, Jinek M. 2016. Structural insights into the molecular mechanism of the m6A writer complex. *eLife* **5**.  
523 [/pmc/articles/PMC5023411/](https://pubmed.ncbi.nlm.nih.gov/25483034/) (Accessed July 20, 2021).
- 524 Suzuki T. 2020. RNA Modifications in Health and Disease. *The FASEB Journal* **34**: 1–1.  
525 <https://onlinelibrary.wiley.com/doi/full/10.1096/fasebj.2020.34.s1.00132> (Accessed September 14, 2021).
- 526 Tan B, Gao S-J. 2018. The RNA Epitranscriptome of DNA Viruses. *Journal of Virology* **92**.  
527 <https://pubmed.ncbi.nlm.nih.gov/30185592/> (Accessed December 14, 2020).
- 528 Tripathi V, Ellis JD, Shen Z, Song DY, Pan Q, Watt AT, Freier SM, Bennett CF, Sharma A, Bubulya PA, et al. 2010. The  
529 Nuclear-Retained Noncoding RNA MALAT1 Regulates Alternative Splicing by Modulating SR Splicing Factor  
530 Phosphorylation. *Molecular cell* **39**: 925. [/pmc/articles/PMC4158944/](https://pubmed.ncbi.nlm.nih.gov/20185592/) (Accessed September 14, 2021).
- 531 Wang X, Feng J, Xue Y, Guan Z, Zhang D, Liu Z, Gong Z, Wang Q, Huang J, Tang C, et al. 2016. Structural basis of N6-  
532 adenosine methylation by the METTL3-METTL14 complex. *Nature* **534**: 575–578.
- 533 Wang X, Lu Z, Gomez A, Hon GC, Yue Y, Han D, Fu Y, Parisien M, Dai Q, Jia G, et al. 2014. N6-methyladenosine-  
534 dependent regulation of messenger RNA stability. *Nature* **505**: 117–120.  
535 <https://www.nature.com/articles/nature12730> (Accessed June 17, 2021).
- 536 Wang X, Zhao BS, Roundtree IA, Lu Z, Han D, Ma H, Weng X, Chen K, Shi H, He C. 2015. N6-methyladenosine  
537 modulates messenger RNA translation efficiency. *Cell* **161**: 1388–1399.
- 538 Wei L-H, Song P, Wang Y, Lu Z, Tang Q, Yu Q, Xiao Y, Zhang X, Duan H-C, Jia G. 2018. The m6A Reader ECT2 Controls  
539 Trichome Morphology by Affecting mRNA Stability in Arabidopsis. *The Plant Cell* **30**: 968–985.  
540 <https://academic.oup.com/plcell/article/30/5/968/6099257> (Accessed September 15, 2021).
- 541 Wein S, Andrews B, Sachsenberg T, Santos-Rosa H, Kohlbacher O, Kouzarides T, Garcia BA, Weissner H. 2020. A  
542 computational platform for high-throughput analysis of RNA sequences and modifications by mass  
543 spectrometry. *Nature Communications* **11**: 1–12. <https://doi.org/10.1038/s41467-020-14665-7> (Accessed  
544 May 10, 2021).
- 545 Withers JB, Li ES, Vallery TK, Yario TA, Steitz JA. 2018. Two herpesviral noncoding PAN RNAs are functionally  
546 homologous but do not associate with common chromatin loci. *PLoS Pathogens* **14**.  
547 [/pmc/articles/PMC6233925/?report=abstract](https://pubmed.ncbi.nlm.nih.gov/30185592/) (Accessed December 9, 2020).
- 548 Wu F, Cheng W, Zhao F, Tang M, Diao Y, Xu R. 2019. Association of N6-methyladenosine with viruses and related  
549 diseases. *Virology Journal* **16**. [/pmc/articles/PMC6849232/](https://pubmed.ncbi.nlm.nih.gov/30185592/) (Accessed July 13, 2021).
- 550 Y L, X W, C L, S H, J Y, S S. 2014. Transcriptome-wide N<sup>6</sup>-methyladenosine profiling of rice callus and leaf reveals the  
551 presence of tissue-specific competitors involved in selective mRNA modification. *RNA biology* **11**: 1180–1188.  
552 <https://pubmed.ncbi.nlm.nih.gov/25483034/> (Accessed September 15, 2021).
- 553 Yang F, Yi F, Han X, Du Q, Liang Z. 2013. MALAT-1 interacts with hnRNP C in cell cycle regulation. *FEBS Letters* **587**:  
554 3175–3181. <https://pubmed.ncbi.nlm.nih.gov/23973260/> (Accessed March 28, 2021).

- 555 Yang Y, Hsu PJ, Chen YS, Yang YG. 2018. Dynamic transcriptomic m6A decoration: Writers, erasers, readers and  
556 functions in RNA metabolism. *Cell Research* **28**: 616–624. <https://pubmed.ncbi.nlm.nih.gov/29789545/>  
557 (Accessed December 9, 2020).
- 558 Zhang W, Eckwahl MJ, Zhou KI, Pan T. 2019. Sensitive and quantitative probing of pseudouridine modification in  
559 mRNA and long noncoding RNA. *RNA* **25**: 1218–1225.
- 560 Zhou KI, Shi H, He C, Parisien M. 2019a. Regulation of Co-transcriptional Pre-mRNA Splicing by m6A through the  
561 Low-Complexity Protein hnRNPG. *Molecular Cell* **76**: 70–81. <https://doi.org/10.1016/j.molcel.2019.07.005>  
562 (Accessed May 12, 2021).
- 563 Zhou KI, Shi H, Lyu R, Wylder AC, Matuszek Ż, Pan JN, He C, Parisien M, Pan T. 2019b. Regulation of Co-  
564 transcriptional Pre-mRNA Splicing by m6A through the Low-Complexity Protein hnRNPG. *Molecular Cell* **76**:  
565 70-81.e9. <https://pubmed.ncbi.nlm.nih.gov/31445886/> (Accessed September 16, 2020).  
566

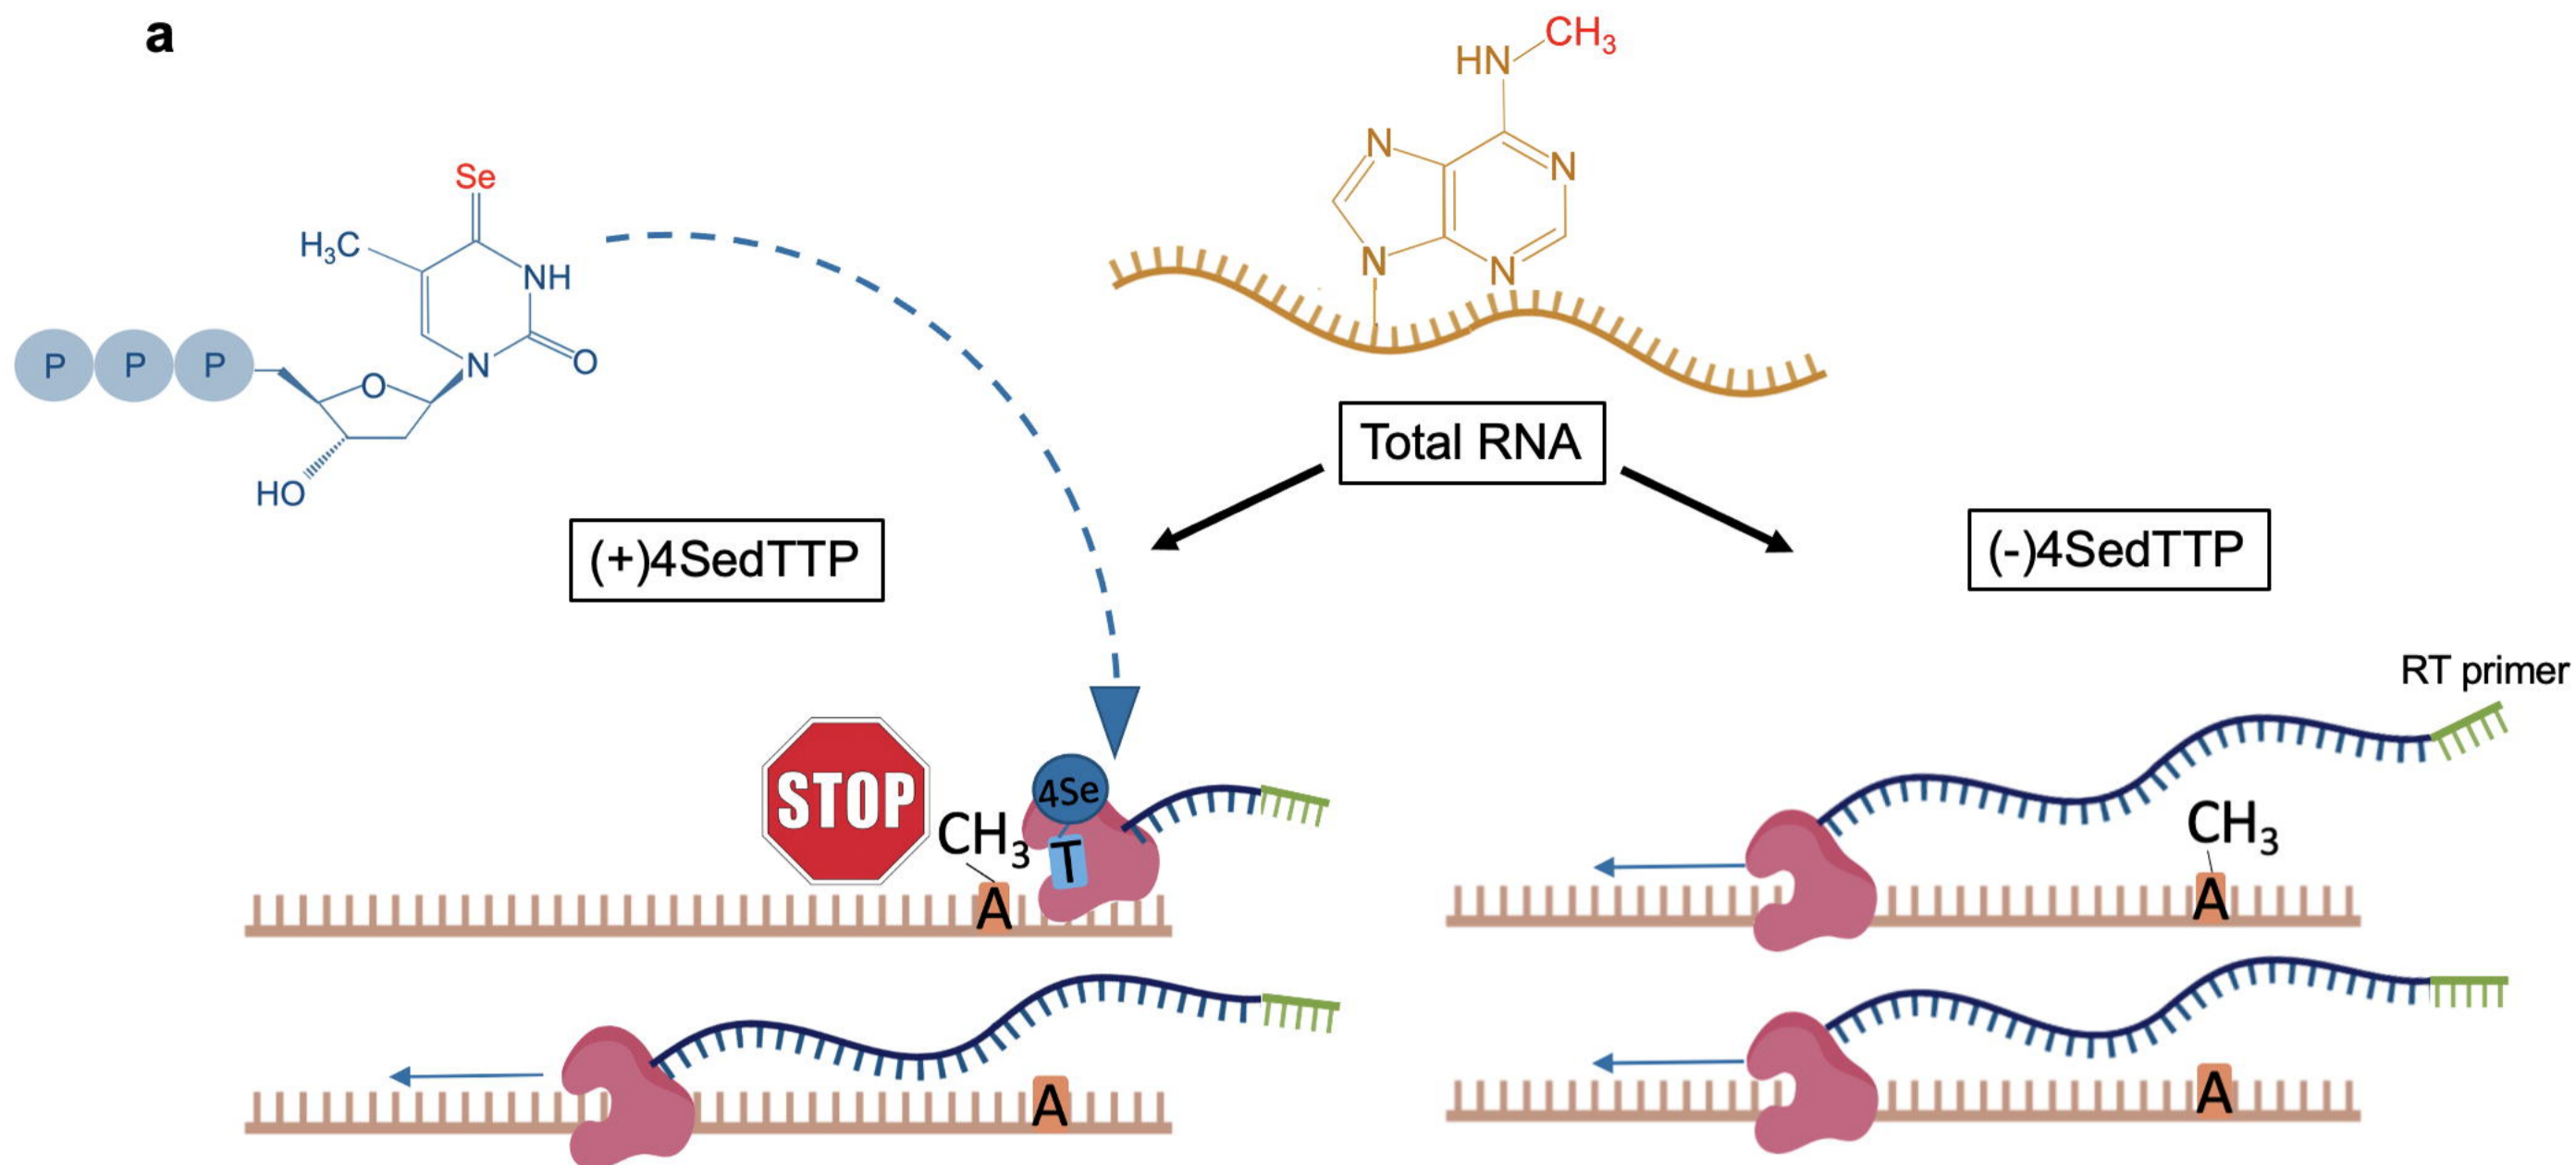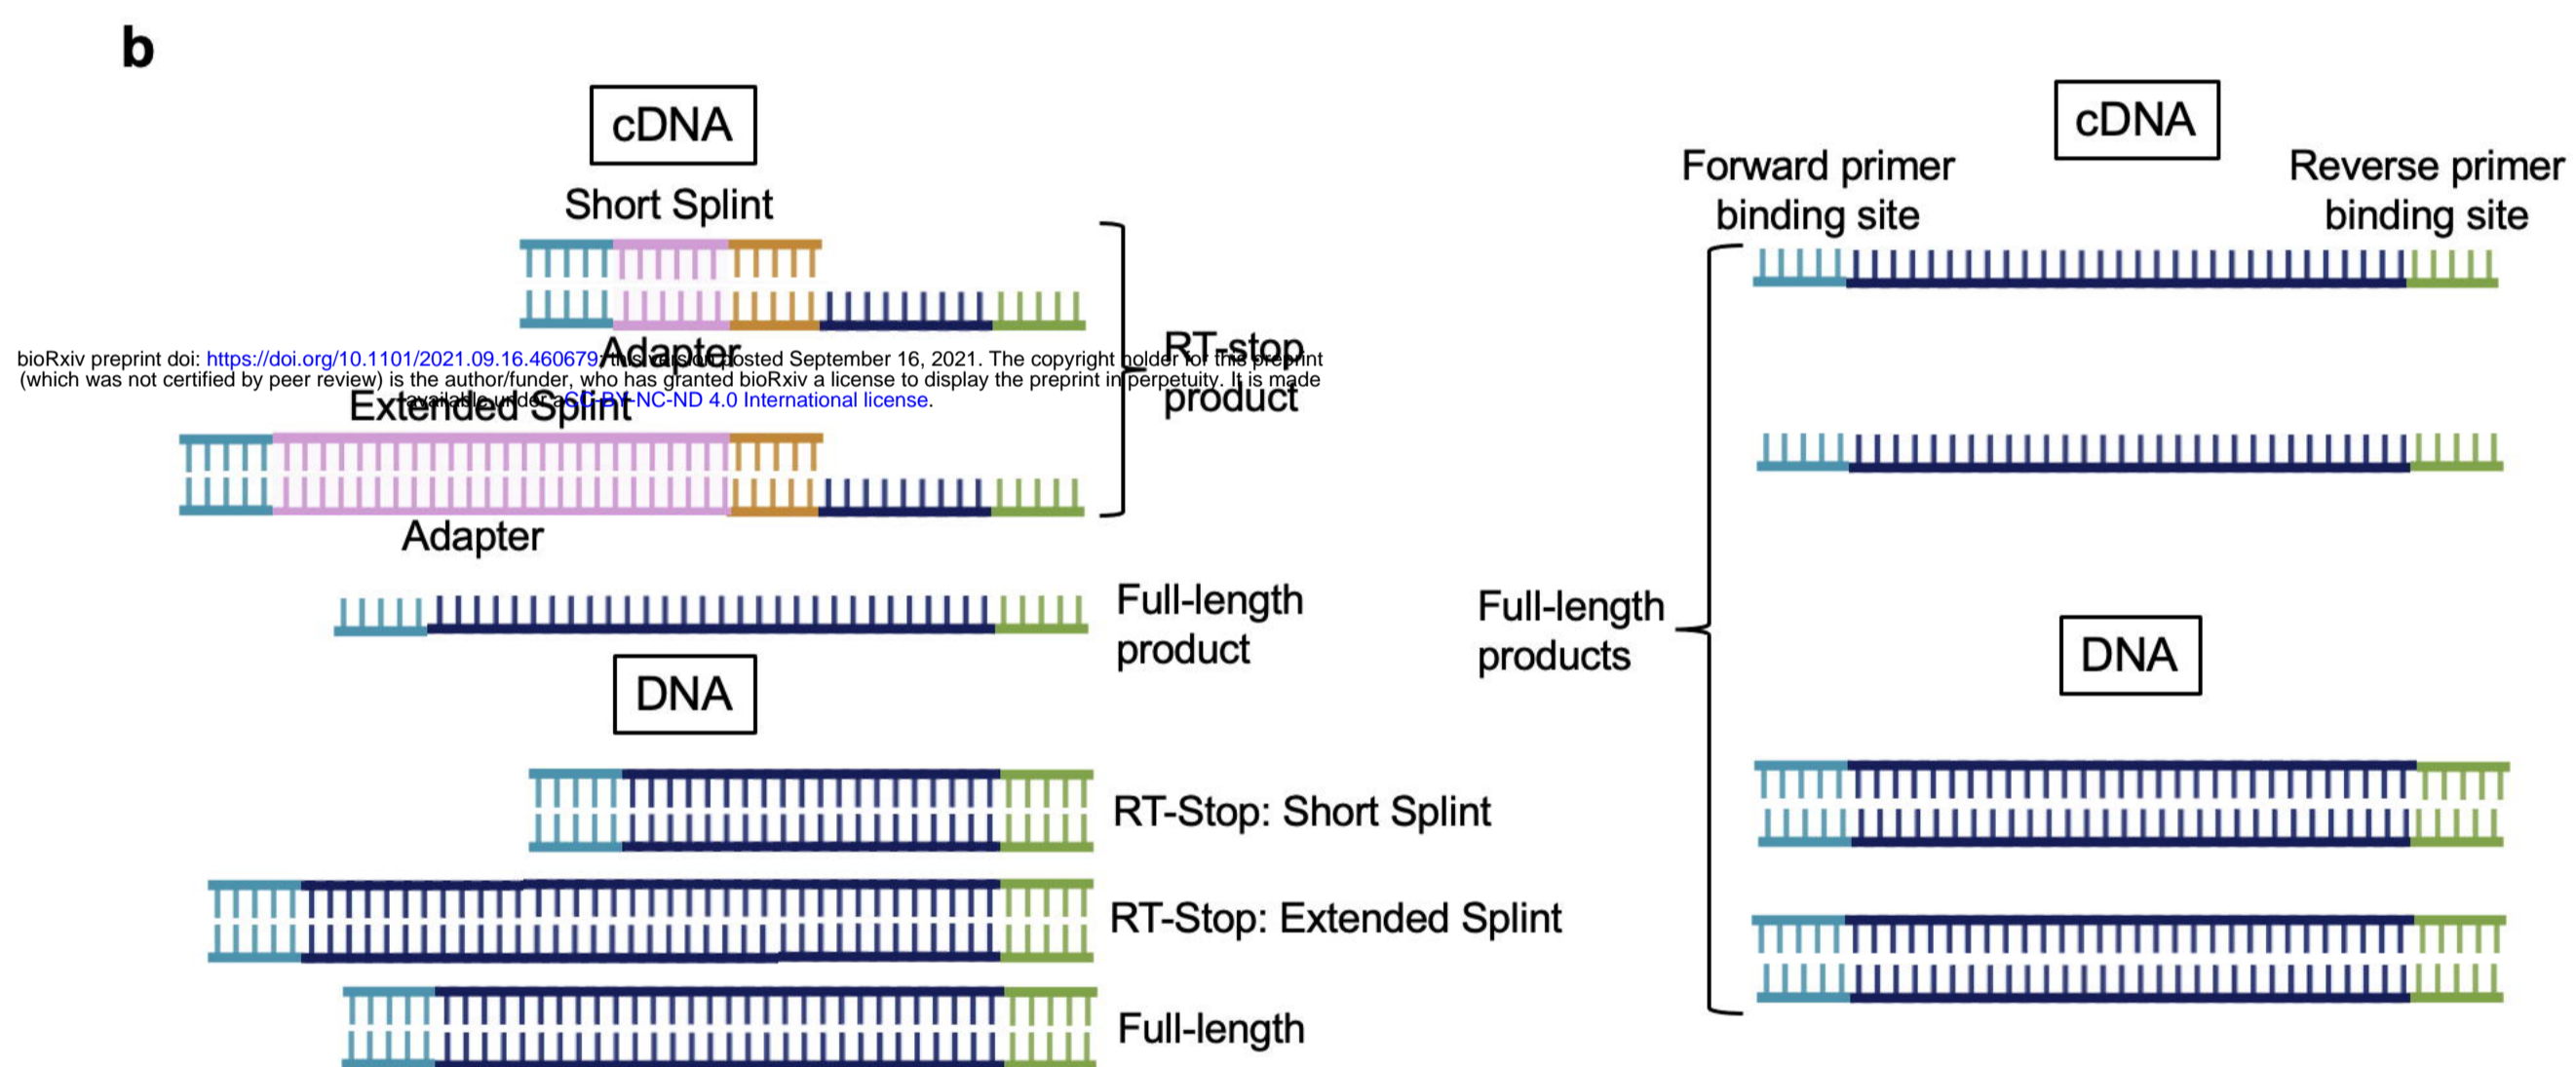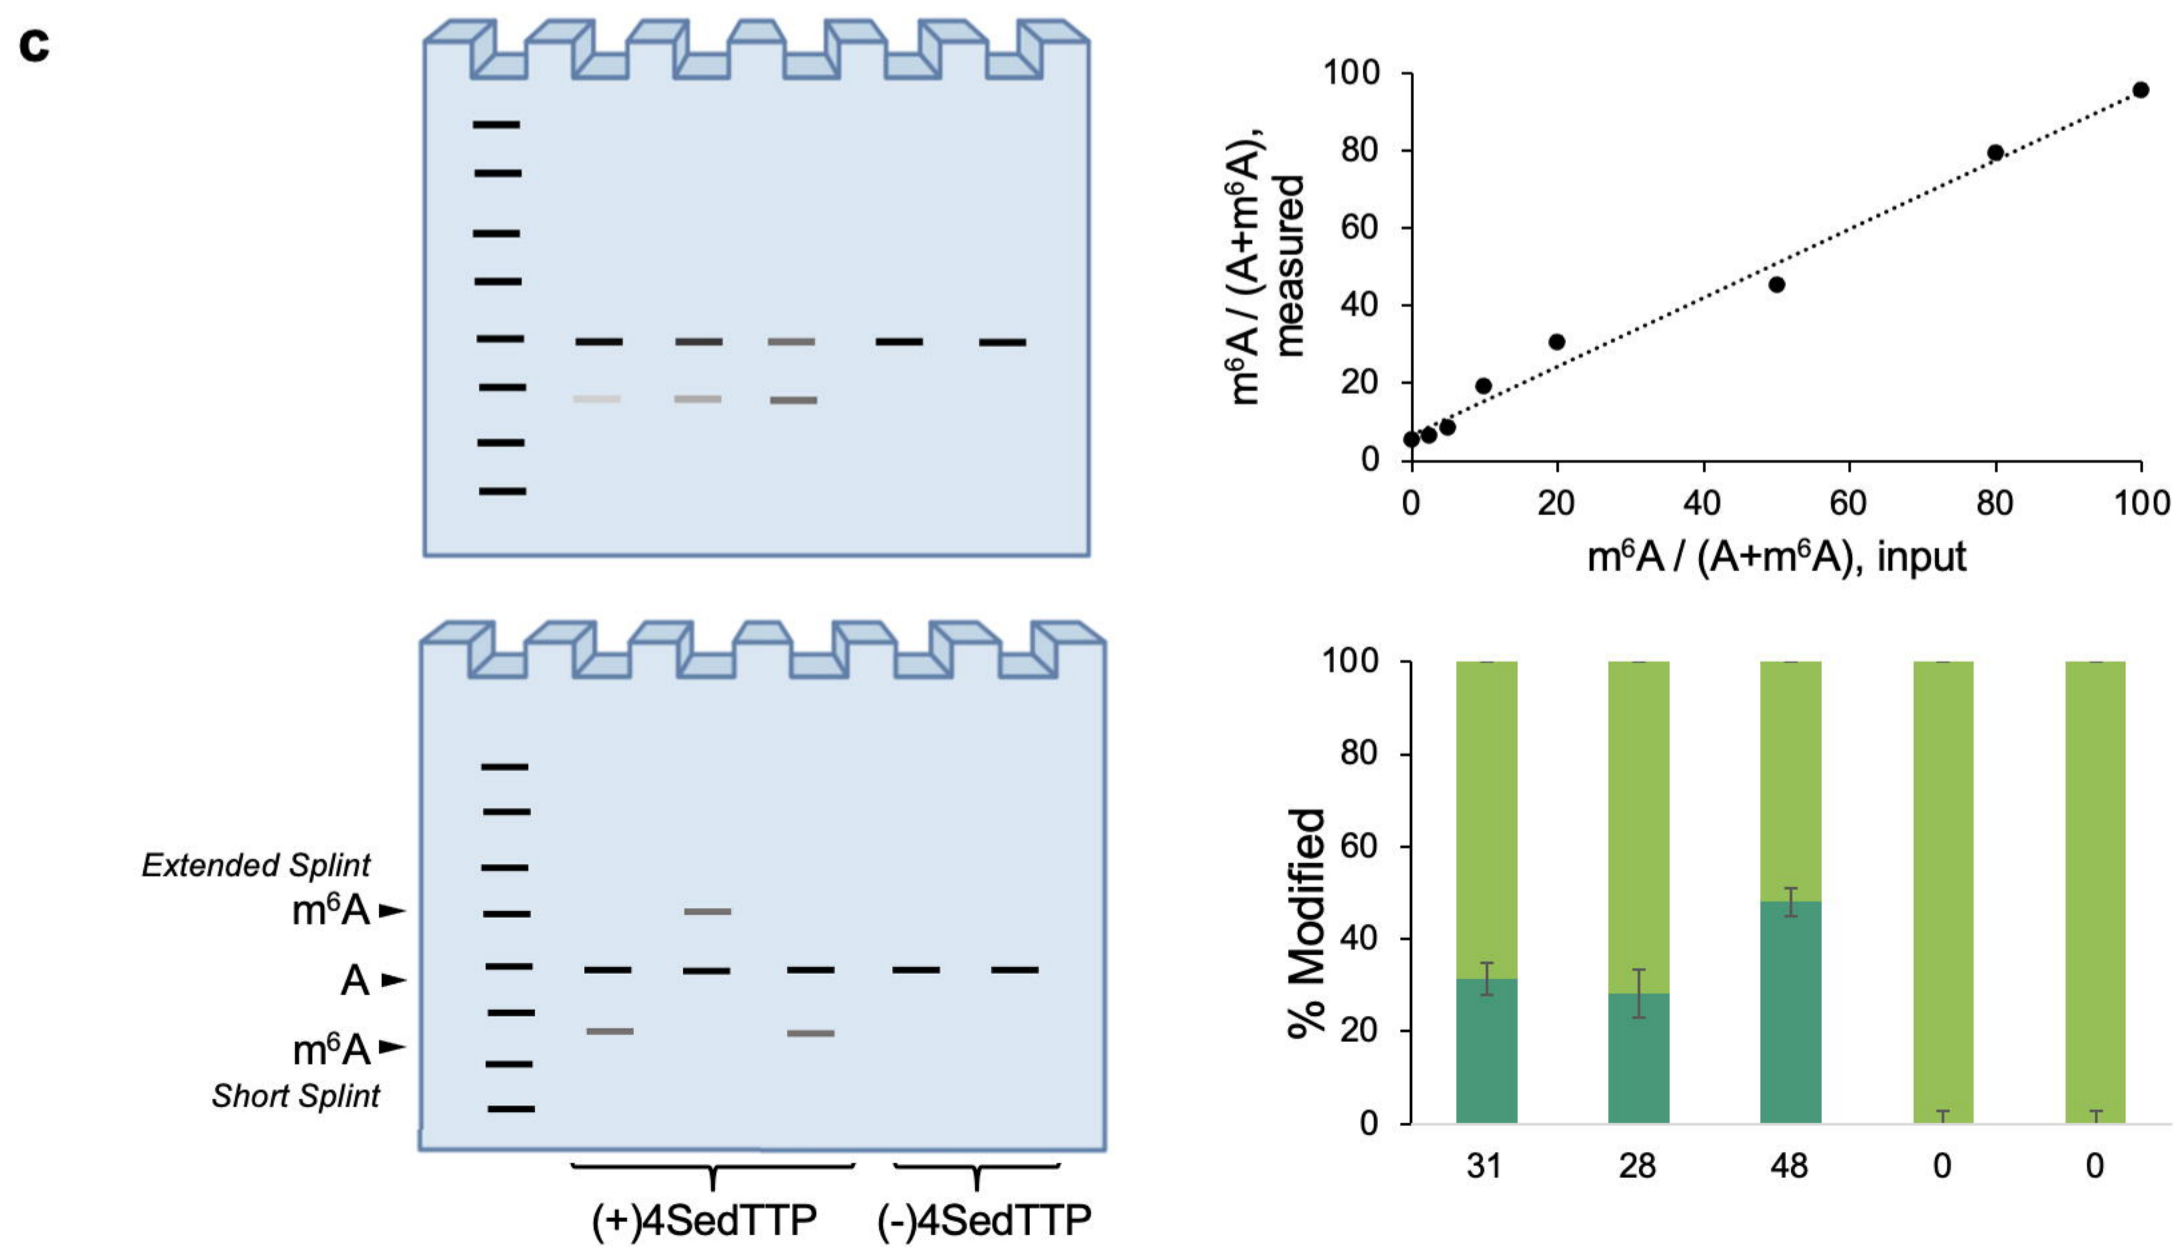



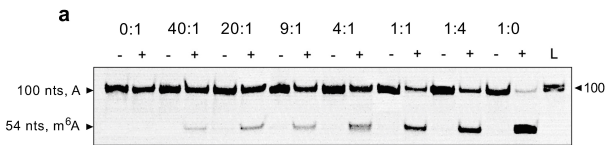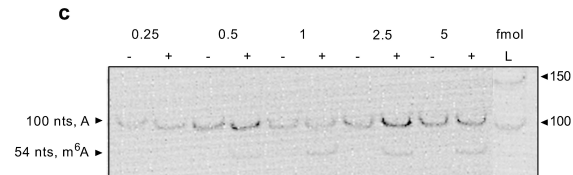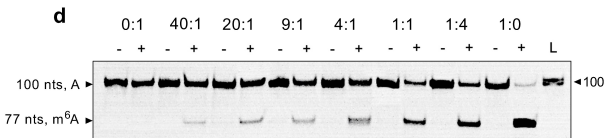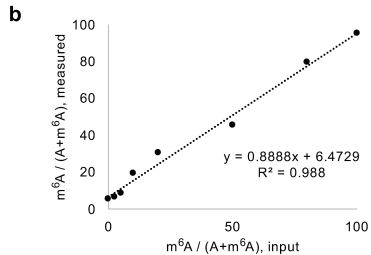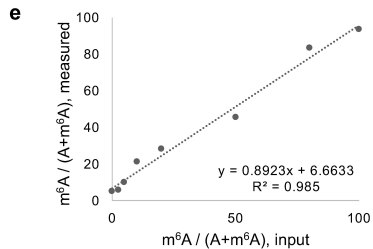

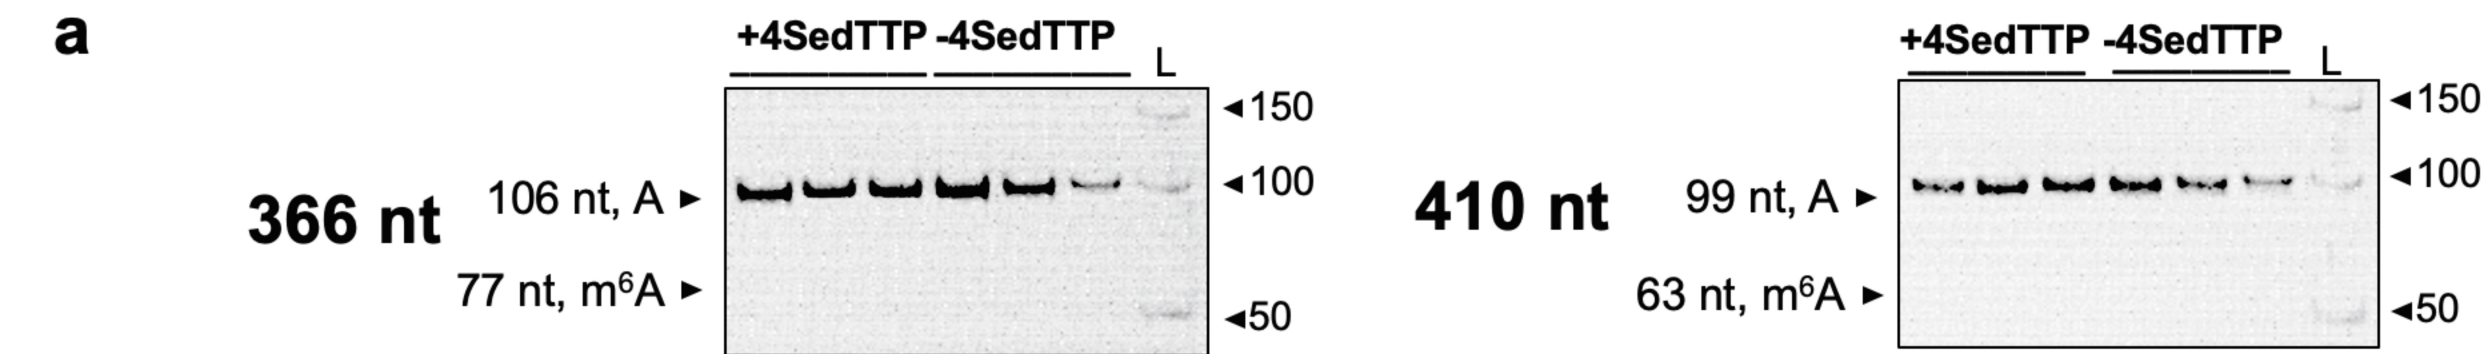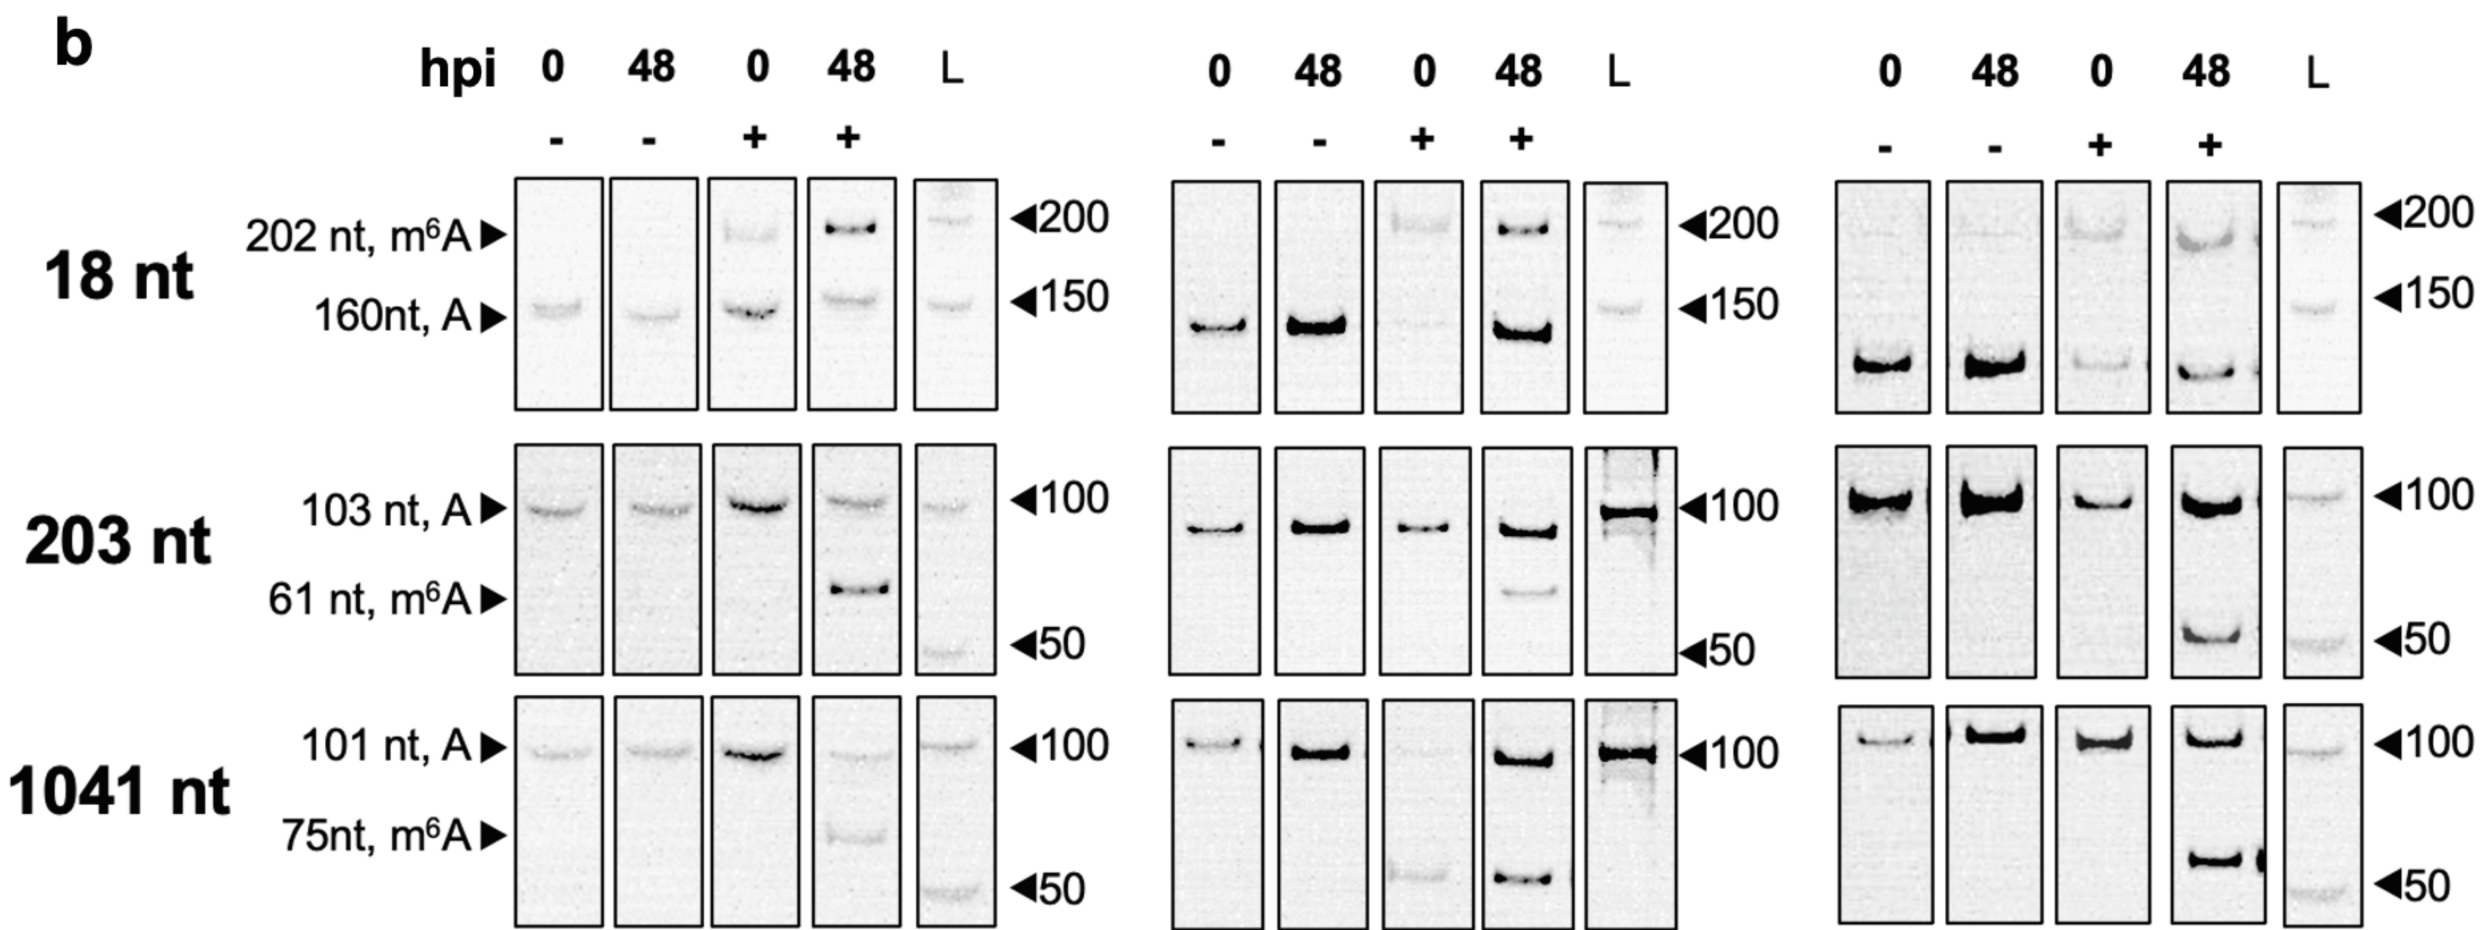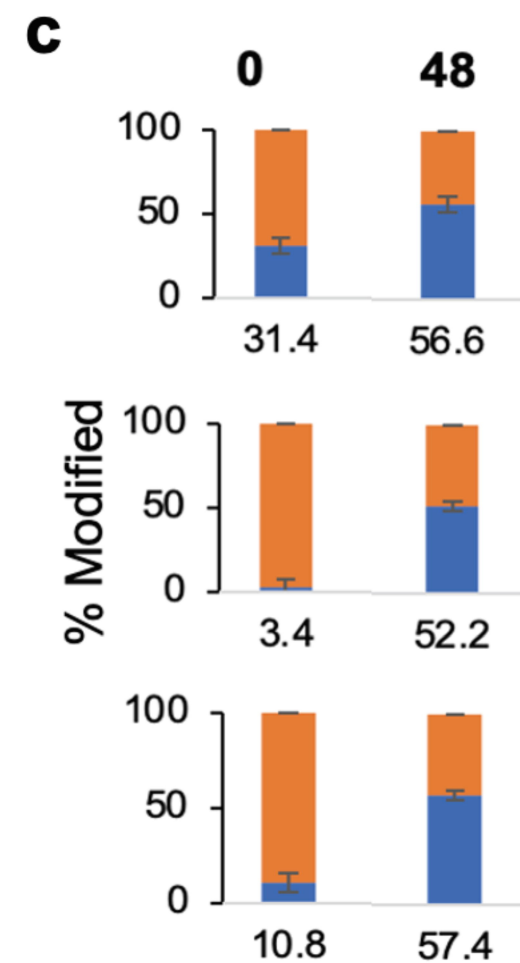

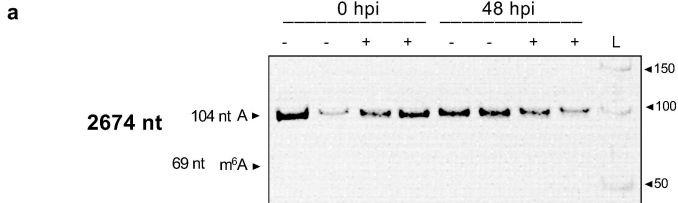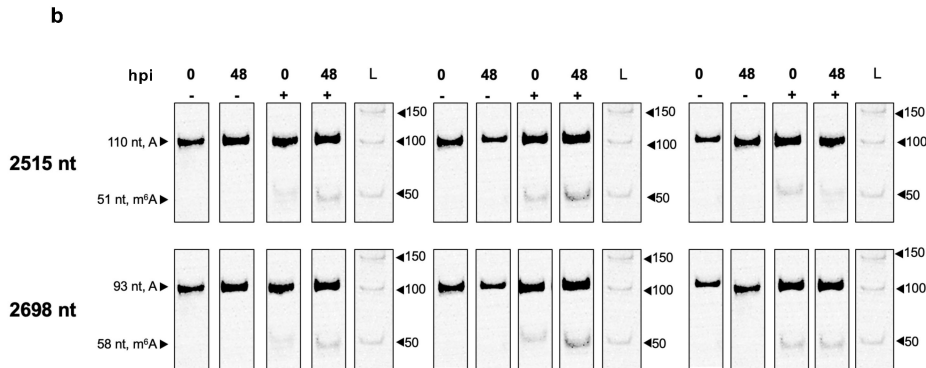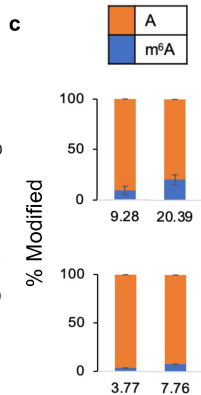

**a**

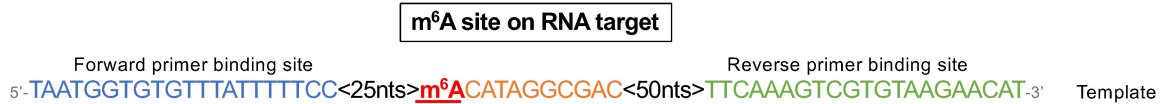

**b**

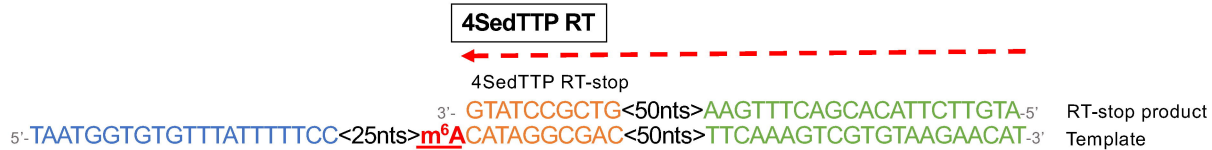

**c**

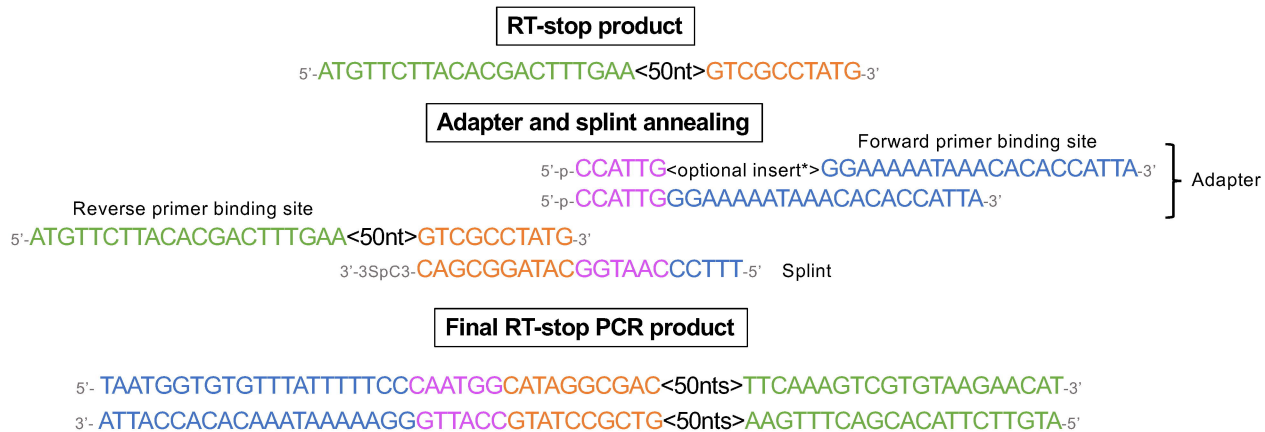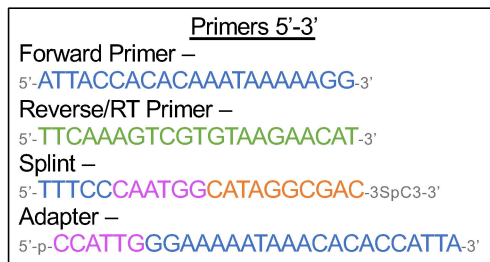

Source: http://biorxiv.org/content/10.1101/2021.09.16.460679v1.full.pdf
